# Supplementary material for: Zircon luminescence dating revisited
Source: Copernicus journal article supplement (doi:10.5194/gchron-6-665-2024), 2024-12-17
Supplement: Supplementary file 1 [file gchron-6-665-2024-supplement.pdf]

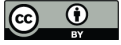

*Supplement of*

## **Zircon luminescence dating revisited**

**Christoph Schmidt et al.**

*Correspondence to:* Christoph Schmidt ([christoph.schmidt@unil.ch](mailto:christoph.schmidt@unil.ch))

The copyright of individual parts of the supplement might differ from the article licence.

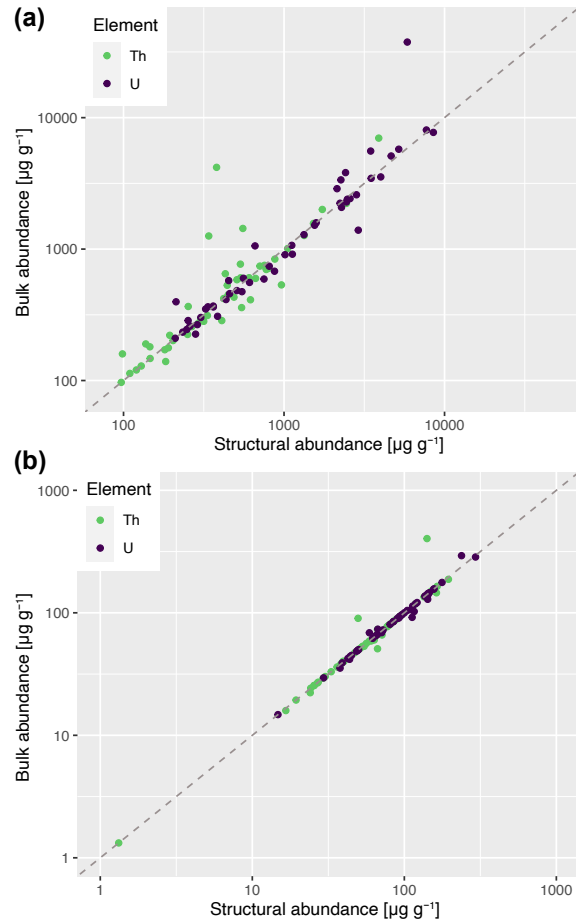

**Figure S1.** Comparison of Th and U contents determined by signal integration of the entire transient ablation signal, including inclusions and impurities (bulk), or the signal component related to the ‘pure’ zircon crystal structure (structural) for samples ZR229 (a) and Can1 (b). The dashed line represents the 1:1 line.

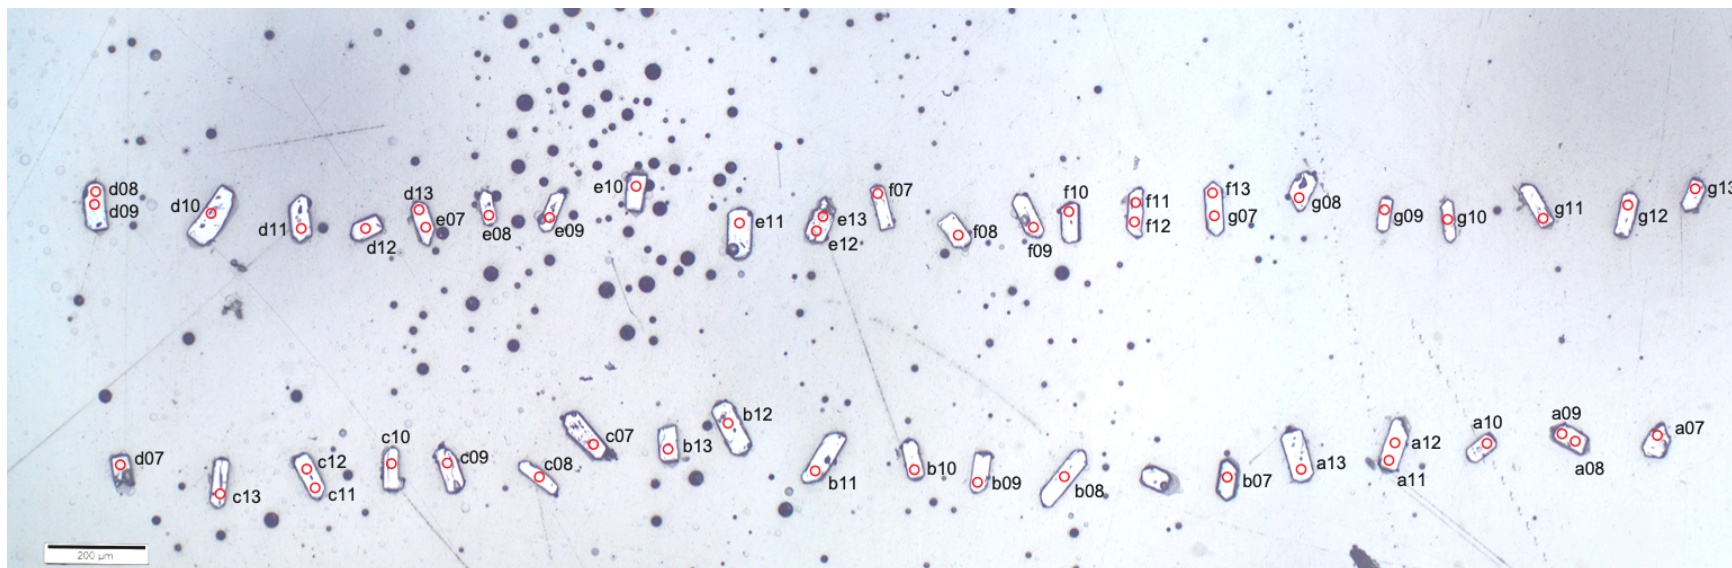

**Figure S2.** Scan of the mount with sample ZR229 with analytical spots indicated as red circles.

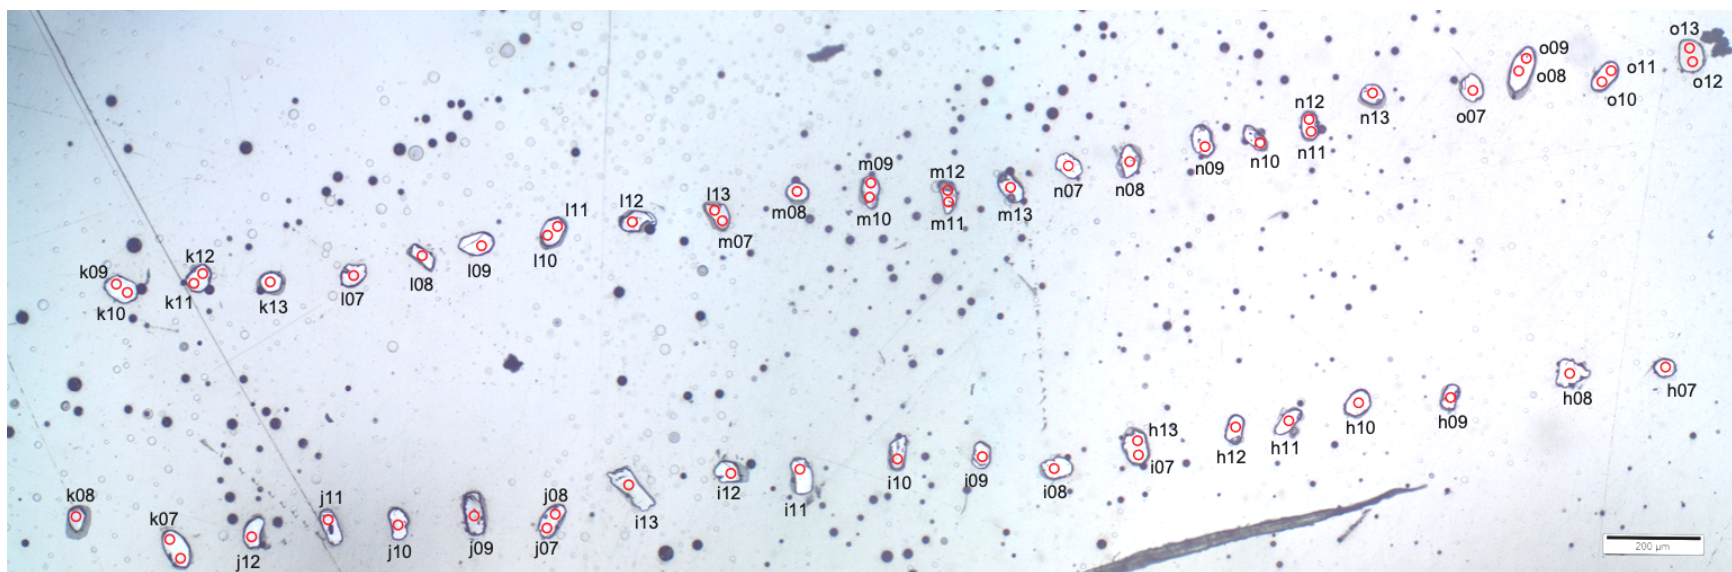

**Figure S3.** Scan of the mount with sample Can1 with analytical spots indicated as red circles.

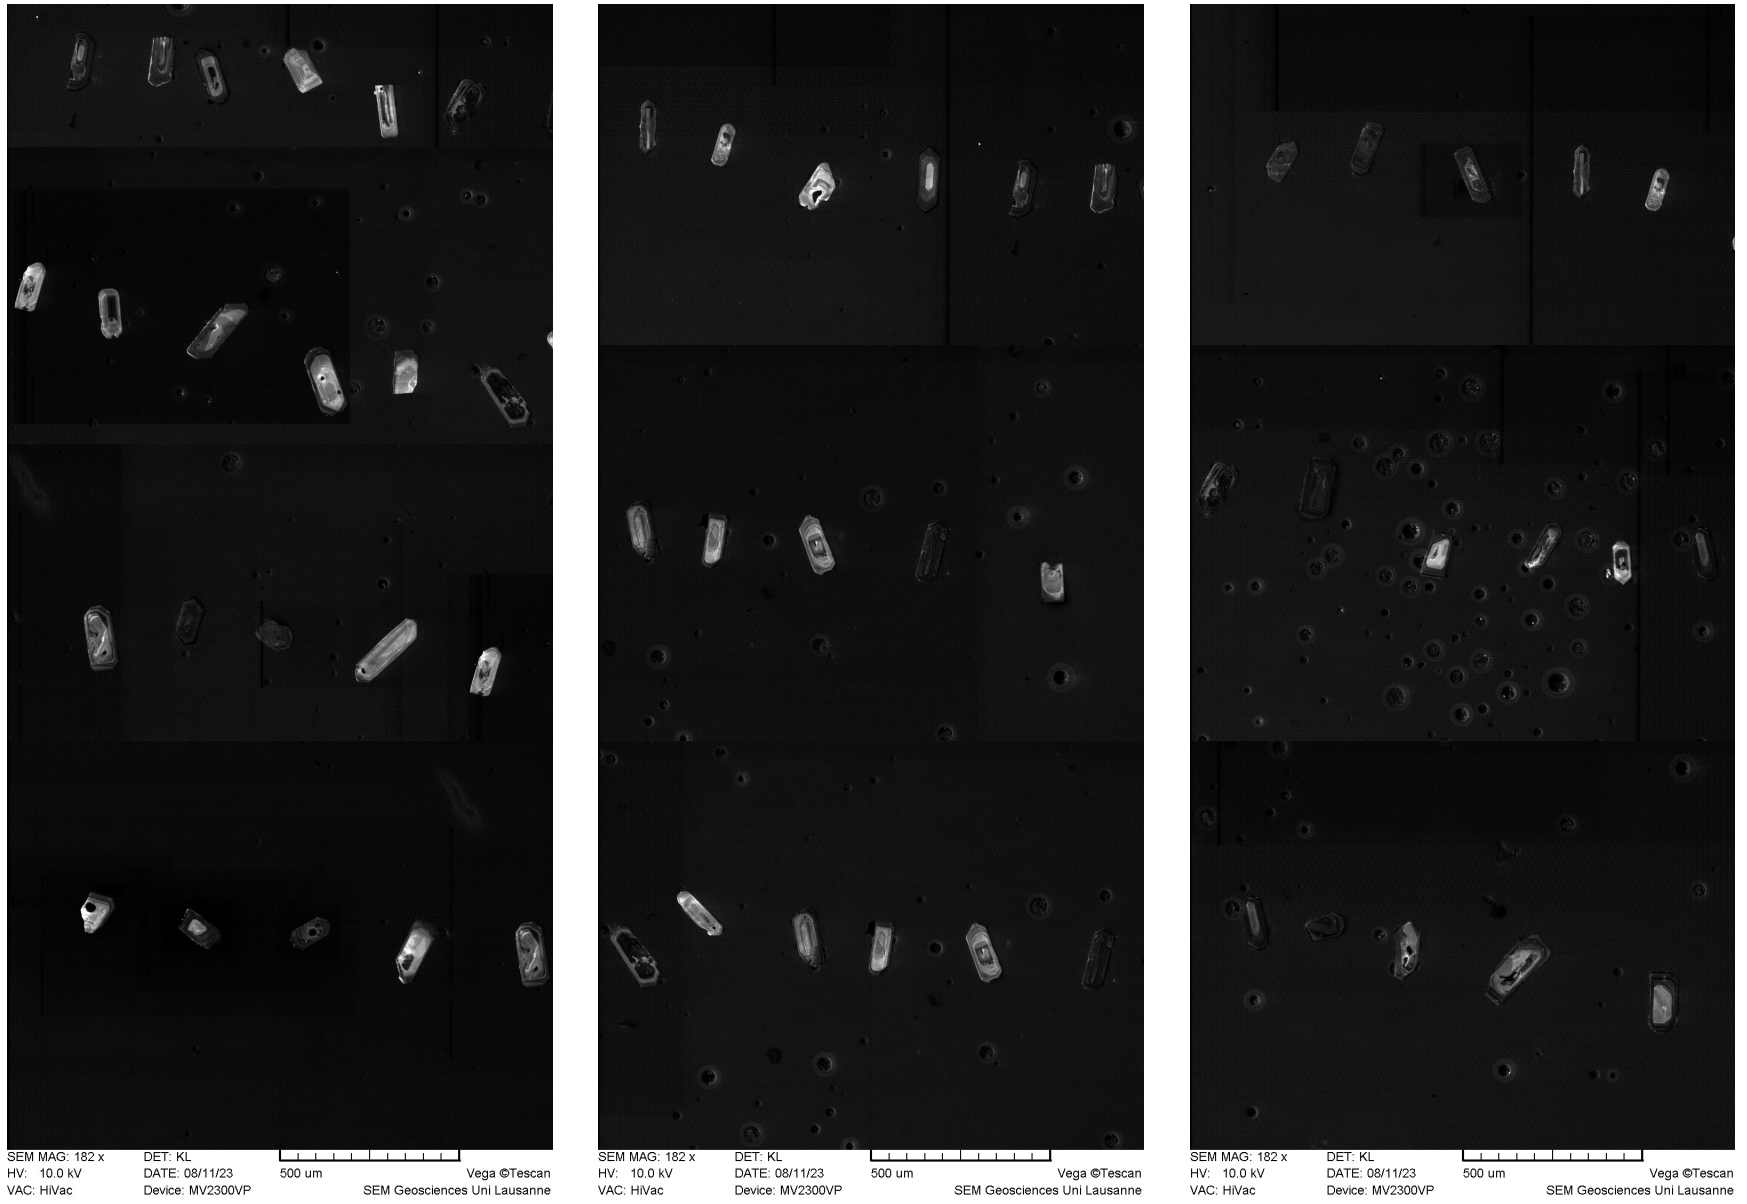

**Figure S4.** Cathodoluminescence images of the zircon sample ZR229.



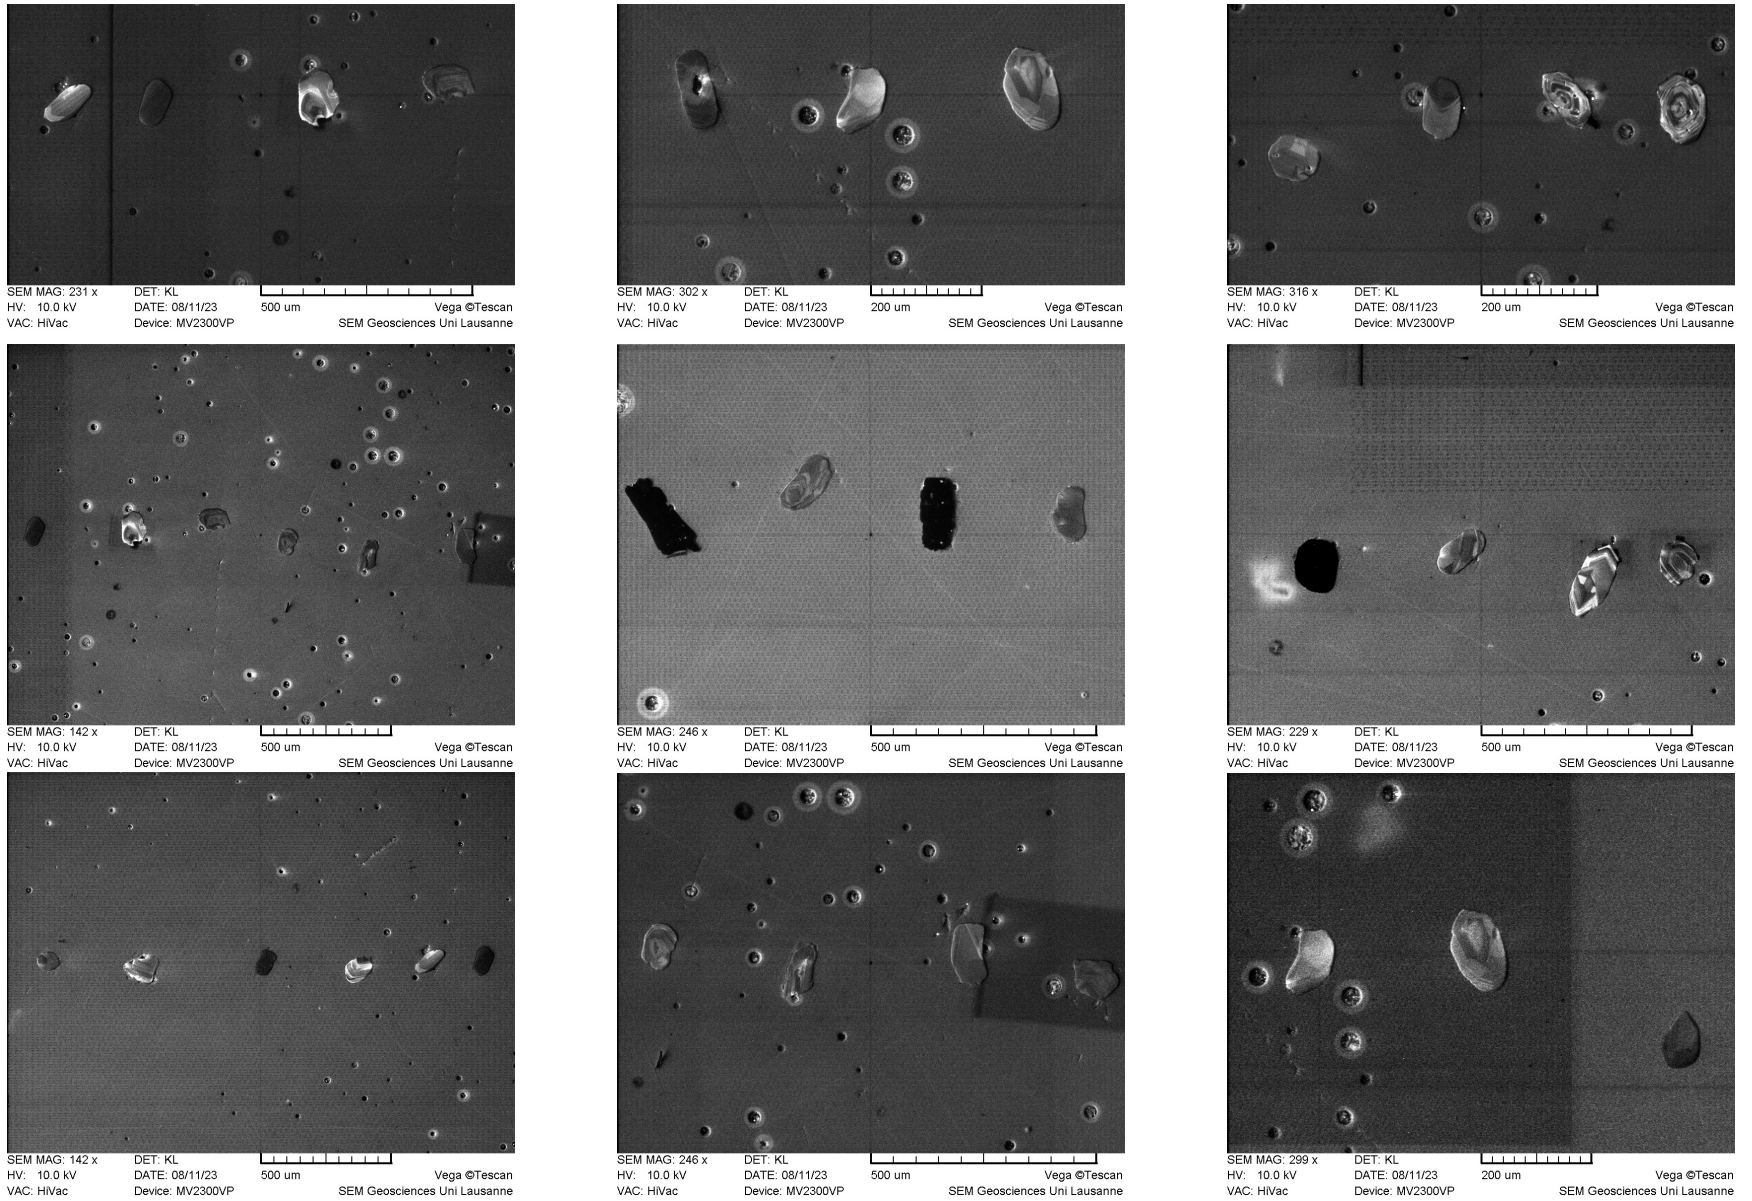

Figure S5. Cathodoluminescence images of the zircon sample Can1.

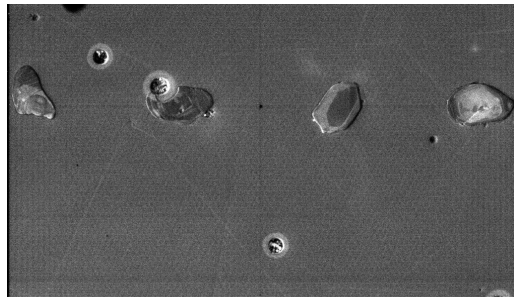

SEM MAG: 262 x DET: KL  
HV: 10.0 kV DATE: 08/11/23 Vega ©Tescan  
VAC: HiVac Device: MV2300VP SEM Geosciences Uni Lausanne

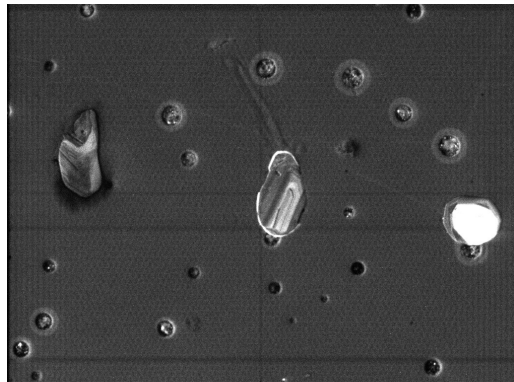

SEM MAG: 374 x DET: KL  
HV: 10.0 kV DATE: 08/11/23 Vega ©Tescan  
VAC: HiVac Device: MV2300VP SEM Geosciences Uni Lausanne

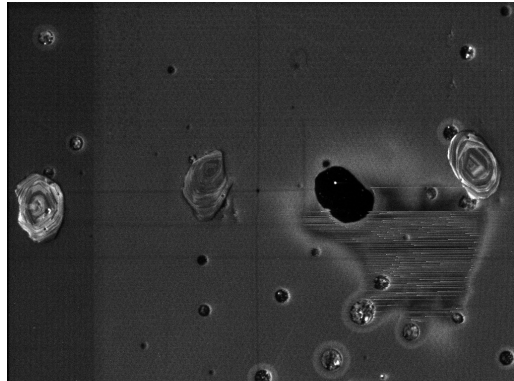

SEM MAG: 316 x DET: KL  
HV: 10.0 kV DATE: 08/11/23 Vega ©Tescan  
VAC: HiVac Device: MV2300VP SEM Geosciences Uni Lausanne

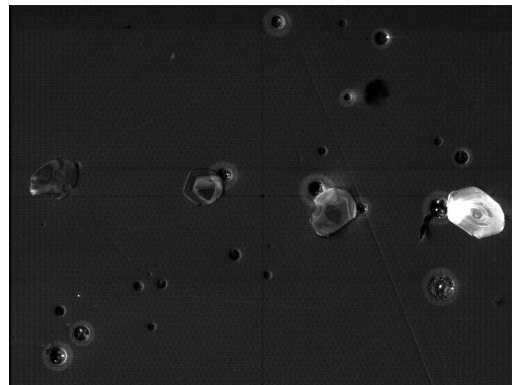

SEM MAG: 256 x DET: KL  
HV: 10.0 kV DATE: 08/11/23 Vega ©Tescan  
VAC: HiVac Device: MV2300VP SEM Geosciences Uni Lausanne

Figure S6. Cathodoluminescence images of the zircon sample Can1.

**Table S1.** Element contents (crystal structure) of sample ZR229, as determined by LA-ICP-MS. Red figures indicate data from two analytical spots on the same grain.

| Isotopic mass<br>Spot ID | Location | Al2O3   | SiO2 | CaO     | TiO2    | Rb                 | Sr                 | Y                  | Nb                 | La                 | Ce                 | Pr                 | Nd                 | Sm                 | Eu                 | Gd                 | Tb                 | Dy                 | Ho                 | Er                 | Tm                 | Yb                 | Lu                 | Hf                 | Ta                 | Th                 | U                  |
|--------------------------|----------|---------|------|---------|---------|--------------------|--------------------|--------------------|--------------------|--------------------|--------------------|--------------------|--------------------|--------------------|--------------------|--------------------|--------------------|--------------------|--------------------|--------------------|--------------------|--------------------|--------------------|--------------------|--------------------|--------------------|--------------------|
|                          |          | 27      | 29   | 42      | 49      | 85                 | 88                 | 89                 | 93                 | 139                | 140                | 141                | 143                | 147                | 151                | 157                | 159                | 163                | 165                | 166                | 169                | 172                | 175                | 178                | 181                | 232                | 238                |
|                          |          | wt%     | wt%  | wt%     | wt%     | µg g <sup>-1</sup> |
| oc03a07                  | Core     | 0.00217 | 32.9 | 0.0321  | 0.00132 | 0.540              | 0.384              | 836.0              | 3.13               | 0.0050             | 11.91              | 0.021              | 0.71               | 2.23               | 0.094              | 13.87              | 5.71               | 74.37              | 28.83              | 135.45             | 27.95              | 276.3              | 54.53              | 10728              | 1.404              | 146.5              | 362.1              |
| oc03a08                  | Core     | 0.00073 | 32.9 | n.d.    | 0.00101 | 0.303              | 0.352              | 1548.0             | 1.97               | 0.0784             | 11.74              | 0.298              | 4.83               | 8.55               | 0.779              | 38.77              | 13.04              | 151.31             | 55.00              | 238.30             | 46.04              | 413.3              | 78.85              | 8982               | 0.782              | 203.6              | 303.0              |
| oc03a09                  | Rim      | n.d.    | 32.9 | n.d.    | 0.0007  | 0.772              | 0.630              | 2661.7             | 20.21              | 0.0041             | 21.03              | 0.030              | 1.12               | 4.06               | 0.175              | 32.98              | 14.29              | 203.72             | 84.07              | 426.19             | 94.53              | 901.8              | 172.40             | 11115              | 10.927             | 774.9              | 2827.2             |
| oc03a10                  | Rim      | 0.00594 | 32.9 | 0.09979 | 0.00096 | 1.155              | 1.446              | 3510.6             | 28.37              | 0.0845             | 86.57              | 0.353              | 6.46               | 13.07              | 1.119              | 63.97              | 24.02              | 297.44             | 113.74             | 546.84             | 111.45             | 1057.6             | 193.88             | 11417              | 11.536             | 3892.1             | 3466.4             |
| oc03a11                  | Rim      | n.d.    | 32.9 | 0.03645 | 0.00068 | 0.388              | 0.353              | 1109.8             | 4.94               | 0.0734             | 17.03              | 0.088              | 1.29               | 3.40               | 0.185              | 20.88              | 7.84               | 101.15             | 39.17              | 179.71             | 37.52              | 341.8              | 67.20              | 10835              | 1.674              | 290.5              | 609.7              |
| oc03a12                  | Core     | 0.00013 | 32.9 | n.d.    | 0.00129 | 0.446              | 0.315              | 833.6              | 1.69               | 0.0132             | 10.15              | 0.059              | 1.27               | 2.94               | 0.252              | 17.11              | 6.04               | 73.31              | 27.92              | 129.44             | 26.33              | 250.2              | 48.69              | 8782               | 0.676              | 120.3              | 233.8              |
| oc03a13                  | Core     | 0.0002  | 32.9 | n.d.    | 0.00049 | 0.561              | 0.448              | 1789.1             | 2.31               | 0.0047             | 20.06              | 0.093              | 2.95               | 7.01               | 0.251              | 41.69              | 14.41              | 171.49             | 62.08              | 284.04             | 54.55              | 490.9              | 92.64              | 10933              | 1.061              | 316.1              | 546.8              |
| oc03b07                  | Core     | 0.00115 | 32.9 | n.d.    | 0.00018 | 0.440              | 0.518              | 2123.2             | 16.48              | 0.1152             | 12.82              | 0.092              | 1.19               | 3.02               | 0.108              | 25.62              | 12.16              | 162.47             | 68.83              | 340.17             | 78.03              | 738.4              | 142.60             | 11471              | 10.428             | 536.2              | 2262.2             |
| oc03b08                  | Core     | 0.00031 | 32.9 | n.d.    | 0.00045 | 0.878              | 0.279              | 1488.1             | 4.29               | 0.0064             | 21.20              | 0.149              | 2.31               | 5.16               | 0.241              | 32.36              | 10.92              | 138.49             | 53.57              | 251.16             | 49.13              | 437.0              | 84.95              | 9898               | 1.613              | 253.1              | 452.1              |
| oc03b09                  | Rim      | n.d.    | 32.9 | n.d.    | 0.00169 | 0.308              | 0.275              | 898.6              | 1.76               | 0.0013             | 10.18              | 0.070              | 1.46               | 3.34               | 0.371              | 17.83              | 6.50               | 79.60              | 30.43              | 143.70             | 29.15              | 270.4              | 54.22              | 8708               | 0.697              | 109.5              | 210.0              |
| oc03b10                  | Core     | 0.00054 | 32.9 | n.d.    | 0.00024 | 1.888              | 1.646              | 7337.4             | 43.94              | 0.0290             | 16.98              | 0.073              | 1.92               | 9.54               | 0.015              | 81.24              | 40.33              | 588.27             | 242.51             | 1185.04            | 245.74             | 2195.7             | 406.01             | 13275              | 20.958             | 1053.2             | 8520.4             |
| oc03b11                  | Core     | 0.00063 | 32.9 | n.d.    | 0.00129 | 0.576              | 0.538              | 2149.0             | 3.78               | 0.0424             | 12.53              | 0.362              | 5.09               | 10.45              | 1.185              | 53.17              | 18.10              | 208.76             | 77.16              | 338.89             | 66.07              | 572.0              | 109.98             | 8794               | 1.231              | 266.7              | 435.2              |
| oc03b12                  | Core     | 0.00034 | 32.9 | n.d.    | 0.00205 | 0.624              | 0.639              | 1807.1             | 1.14               | 0.0185             | 9.28               | 0.388              | 6.39               | 9.46               | 1.115              | 47.48              | 15.20              | 168.17             | 60.75              | 270.38             | 52.80              | 448.8              | 83.77              | 8701               | 0.491              | 146.0              | 212.5              |
| oc03b13                  | Core     | 0.05347 | 32.9 | n.d.    | 0.00445 | 12.116             | 0.464              | 1795.0             | 1.51               | 0.0058             | 12.30              | 0.199              | 4.31               | 9.50               | 0.864              | 48.94              | 15.80              | 177.17             | 63.75              | 288.09             | 53.65              | 471.1              | 88.56              | 9383               | 0.595              | 190.3              | 288.4              |
| oc03c07                  | Core     | 0.82877 | 32.9 | 0.74725 | 0.00177 | 2.212              | 50.834             | 3086.7             | 32.67              | 41.3481            | 279.73             | 26.933             | 151.74             | 52.85              | 2.033              | 69.56              | 21.34              | 249.91             | 94.01              | 532.07             | 129.85             | 1316.2             | 290.04             | 20594              | 41.987             | 380.0              | 5861.6             |
| oc03c08                  | Core     | 0.00041 | 32.9 | n.d.    | 0.00124 | 0.520              | 0.556              | 1614.3             | 2.43               | 0.0075             | 13.21              | 0.208              | 3.62               | 7.09               | 0.520              | 36.18              | 12.38              | 146.28             | 56.25              | 261.40             | 49.48              | 448.8              | 86.82              | 9256               | 0.886              | 194.1              | 335.7              |
| oc03c09                  | Core     | n.d.    | 32.9 | n.d.    | 0.00121 | 0.965              | 0.594              | 3108.7             | 3.05               | 0.0435             | 20.50              | 0.701              | 11.32              | 21.45              | 2.800              | 87.33              | 27.38              | 306.74             | 106.87             | 470.71             | 91.46              | 791.1              | 145.68             | 8278               | 1.052              | 508.7              | 558.8              |
| oc03c10                  | Core     | 0.00033 | 32.9 | n.d.    | 0.00083 | 1.756              | 1.037              | 5600.2             | 7.80               | 0.1268             | 55.21              | 1.142              | 19.30              | 35.12              | 3.686              | 152.41             | 48.66              | 545.37             | 191.43             | 821.70             | 155.75             | 1329.8             | 248.63             | 8672               | 1.869              | 1334.9             | 1117.8             |
| oc03c11                  | Rim      | 0.00021 | 32.9 | 0.04004 | 0.00139 | n.d.               | 0.312              | 834.1              | 2.07               | 0.0034             | 10.04              | 0.067              | 1.44               | 3.40               | 0.314              | 17.57              | 6.08               | 73.51              | 27.80              | 130.78             | 26.50              | 250.2              | 49.06              | 8837               | 0.808              | 129.0              | 259.7              |
| oc03c12                  | Core     | 0.00051 | 32.9 | 0.50275 | 0.00053 | 1.095              | 1.713              | 3128.8             | 5.66               | 6.5928             | 49.96              | 3.816              | 26.17              | 21.86              | 1.611              | 83.25              | 26.85              | 311.88             | 108.64             | 477.29             | 93.34              | 791.0              | 147.83             | 8876               | 1.388              | 618.1              | 750.2              |
| oc03c13                  | Rim      | 0.00269 | 32.9 | n.d.    | 0.00184 | 1.566              | 1.230              | 5681.3             | 9.00               | 0.0232             | 10.26              | 0.346              | 5.44               | 16.63              | 0.754              | 100.64             | 41.73              | 530.56             | 188.54             | 845.38             | 169.24             | 1498.4             | 293.64             | 10193              | 4.544              | 876.8              | 3490.0             |
| oc03d07                  | Core     | n.d.    | 32.9 | n.d.    | 0.00044 | 0.498              | 0.405              | 1191.5             | 3.95               | n.d.               | 18.74              | 0.067              | 1.36               | 3.95               | 0.157              | 22.00              | 8.08               | 102.96             | 39.99              | 195.47             | 38.77              | 353.5              | 70.45              | 10874              | 1.844              | 245.7              | 508.6              |
| oc03d08                  | Rim      | n.d.    | 32.9 | n.d.    | n.d.    | 0.757              | 0.814              | 2062.4             | 26.34              | 0.0097             | 15.76              | 0.031              | 0.80               | 3.49               | 0.035              | 26.95              | 12.43              | 177.30             | 70.53              | 346.19             | 74.77              | 689.3              | 133.52             | 12228              | 12.863             | 800.5              | 2577.9             |
| oc03d09                  | Core     | n.d.    | 32.9 | n.d.    | 0.00083 | 0.416              | 0.546              | 2036.4             | 1.60               | 0.0226             | 13.62              | 0.368              | 6.29               | 11.63              | 1.163              | 52.46              | 17.04              | 195.94             | 70.91              | 312.62             | 60.22              | 534.5              | 104.27             | 8804               | 0.600              | 250.8              | 324.8              |
| oc03d10                  | Core     | 0.00044 | 32.9 | n.d.    | 0.00061 | n.d.               | 0.450              | 540.7              | 4.15               | 0.0043             | 6.05               | 0.017              | 0.29               | 0.97               | 0.059              | 7.37               | 3.19               | 44.42              | 18.57              | 94.38              | 19.92              | 190.0              | 39.28              | 11592              | 2.126              | 96.8               | 362.7              |
| oc03d11                  | Core     | n.d.    | 32.9 | n.d.    | 0.00046 | n.d.               | 0.408              | 1515.1             | 5.19               | 0.2012             | 20.72              | 0.241              | 2.78               | 4.50               | 0.400              | 27.34              | 9.78               | 126.57             | 50.76              | 255.90             | 51.35              | 481.7              | 93.25              | 10635              | 1.885              | 339.7              | 659.9              |
| oc03d12                  | Core     | 0.00597 | 32.9 | 0.60582 | 0.00051 | 2.052              | 2.148              | 5323.1             | 18.77              | 8.3564             | 58.40              | 5.827              | 34.39              | 22.61              | 0.494              | 88.39              | 34.05              | 442.47             | 170.06             | 813.03             | 179.89             | 1574.8             | 303.65             | 12000              | 9.452              | 1525.2             | 4007.3             |
| oc03d13                  | Rim      | 0.00097 | 32.9 | 0.18454 | 0.00053 | 0.909              | 1.003              | 2580.3             | 15.62              | 7.3687             | 42.13              | 3.617              | 18.14              | 10.16              | 0.545              | 38.76              | 14.88              | 198.84             | 79.78              | 403.49             | 87.79              | 858.5              | 167.36             | 10769              | 8.350              | 755.5              | 2481.3             |
| oc03e07                  | Core     | 0.00121 | 32.9 | n.d.    | 0.00145 | 0.717              | 0.469              | 2238.8             | 2.59               | 0.0495             | 14.61              | 0.378              | 5.30               | 10.56              | 2.184              | 51.70              | 17.01              | 198.31             | 73.68              | 348.24             | 70.65              | 655.3              | 134.29             | 8638               | 1.103              | 487.8              | 808.8              |
| oc03e08                  | Core     | 0.00081 | 32.9 | 0.20044 | 0.00181 | 1.554              | 1.064              | 4222.0             | 18.47              | 3.8664             | 97.15              | 2.716              | 19.49              | 21.95              | 1.066              | 105.06             | 34.97              | 411.78             | 144.68             | 638.35             | 126.04             | 1089.2             | 208.80             | 8553               | 5.008              | 2447.3             | 2447.2             |
| oc03e09                  | Core     | 0.24391 | 32.9 | n.d.    | 0.00074 | 2.901              | 0.825              | 2552.5             | 6.56               | 0.5876             | 31.13              | 0.463              | 6.75               | 12.19              | 0.966              | 61.90              | 19.85              | 233.31             | 83.49              | 401.61             | 75.32              | 657.6              | 127.19             | 9809               | 3.272              | 544.2              | 872.7              |
| oc03e10                  | Core     | n.d.    | 32.9 | n.d.    | 0.00257 | 0.463              | 0.455              | 1136.1             | 2.85               | 0.0104             | 9.07               | 0.111              | 1.93               | 4.68               | 0.475              | 22.49              | 8.34               | 100.55             | 40.41              | 193.04             | 36.24              | 356.6              | 75.18              | 8758               | 0.809              | 137.6              | 252.6              |
| oc03e11                  | Core     | n.d.    | 32.9 | n.d.    | 0.00059 | 1.043              | 0.861              | 3303.1             | 10.79              | 0.0077             | 19.05              | 0.060              | 1.65               | 5.61               | 0.118              | 45.83              | 20.71              | 285.33             | 116.68             | 577.36             | 119.92             | 1076.4             | 202.43             | 13357              | 6.985              | 963.7              | 2901.3             |
| oc03e12                  | Core     | 0.0038  | 32.9 | 0.0457  | 0.00031 | 2.036              | 1.848              | 5703.0             | 98.64              | 0.1135             | 21.40              | 0.278              | 2.83               | 8.37               | 0.302              | 70.92              | 33.77              | 488.13             | 197.81             | 978.30             | 199.44             | 1736.7             | 329.46             | 15280              | 31.506             | 707.6              | 7711.3             |
| oc03e13                  | Core     | 0.01568 | 32.9 | 0.04955 | 0.00234 | 2.255              | 2.200              | 3007.4             | 36.53              | 0.2624             | 9.55               | 0.293              | 2.27               | 3.18               | 0.427              | 25.59              | 13.36              | 202.42             | 99.96              | 588.40             | 140.02             | 1394.5             | 286.36             | 17091              | 19.879             | 442.8              | 5186.7             |
| oc03f07                  | Rim      | n.d.    | 32.9 | n.d.    | 0.00052 | n.d.               | 0.212              | 1114.6             | 3.79               | 0.0117             | 14.01              | 0.070              | 1.65               | 2.88               | 0.458              | 18.79              | 6.69               | 87.38              | 36.25              | 179.20             | 35.76              | 352.4              | 70.04              | 9976               | 1.085              | 180.7              | 385.5              |
| oc03f08                  | Core     | 0.00037 | 32.9 | n.d.    | 0.00148 | 0.619              | 0.316              | 1871.5             | 1.87               | 0.0209             | 9.46               | 0.298              | 5.94               | 10.66              | 1.002              | 45.72              | 15.52              | 181.63             | 64.93              | 309.64             | 60.04              | 502.9              | 96.81              | 9217               | 0.500              | 183.1              | 281.1              |
| oc03f09                  | Rim      | 0.0291  | 32.9 | n.d.    | 0.00194 | 2.923              | 0.653              | 1245.3             | 6.31               | 0.0676             | 17.93              | 0.119              | 1.56               | 3.39               | 0.282              | 20.50              | 8.07               | 101.71             | 39.76              | 204.66             | 44.59              | 396.1              | 84.86              | 12142              | 3.134              | 302.3              | 1014.7             |
| oc03f10                  | Rim      | n.d.    | 32.9 | 0.6526  | n.d.    | 0.767              | 1.537              | 1626.6             | 13.35              | 16.5468            | 69.26              | 7.881              | 40.56              | 16.21              | 0.309              | 37.68              | 11.36              | 142.23             | 55.08              | 276.80             | 55.69              | 519.3              | 96.03              | 12784              | 7.908              | 430.8              | 1550.9             |
| oc03f11                  | Rim      | 0.00641 | 32.9 | 0.08293 | 0.00106 | 1.776              | 1.379              | 5115.1             | 24.17              | 0.1881             | 25.53              | 0.447              | 5.70               | 13.78              | 0.352              | 85.54              | 33.88              | 438.72             | 165.55             | 779.97             | 163.73             | 1445.4             | 270.51             | 10827              | 12.164             | 1732.3             | 4651.1             |
| oc03f12                  | Core     | 0.01462 | 32.9 | n.d.    | 0.00111 | 0.839              | 0.480              | 2018.1             | 10.85              | 0.0201             | 8.60               | 0.103              | 2.07               | 6.21               | 0.262              | 40.61              | 15.12              |                    |                    |                    |                    |                    |                    |                    |                    |                    |                    |

**Table S2.** Element contents (crystal structure) of sample Can1, as determined by LA-ICP-MS. Red figures indicate data from two analytical spots on the same grain.

| Isotopic mass<br>Spot ID | Location | Al <sub>2</sub> O <sub>3</sub> | SiO <sub>2</sub> | CaO     | TiO <sub>2</sub> | Rb                 | Sr                 | Y                  | Nb                 | La                 | Ce                 | Pr                 | Nd                 | Sm                 | Eu                 | Gd                 | Tb                 | Dy                 | Ho                 | Er                 | Tm                 | Yb                 | Lu                 | Hf                 | Ta                 | Th                 | U                  |
|--------------------------|----------|--------------------------------|------------------|---------|------------------|--------------------|--------------------|--------------------|--------------------|--------------------|--------------------|--------------------|--------------------|--------------------|--------------------|--------------------|--------------------|--------------------|--------------------|--------------------|--------------------|--------------------|--------------------|--------------------|--------------------|--------------------|--------------------|
|                          |          | wt%                            | wt%              | wt%     | wt%              | µg g <sup>-1</sup> |
| oc03h07                  | Rim      | 0.01023                        | 32.9             | 0.02382 | 0.00344          | 0.438              | 0.390              | 1422.6             | 0.73               | 0.0052             | 1.98               | 0.147              | 2.76               | 6.53               | 0.129              | 35.20              | 11.36              | 129.38             | 48.33              | 219.80             | 42.46              | 382.2              | 76.48              | 10012              | 0.296              | 53.4               | 97.0               |
| oc03h08                  | Core     | n.d.                           | 32.9             | n.d.    | 0.00165          | 0.425              | 0.271              | 1010.8             | 0.37               | 0.0087             | 6.78               | 0.170              | 3.52               | 6.31               | 1.461              | 27.67              | 8.76               | 96.38              | 33.81              | 144.55             | 29.07              | 247.4              | 48.05              | 8505               | 0.127              | 78.3               | 93.0               |
| oc03h09                  | Core     | 0.00014                        | 32.9             | n.d.    | 0.00093          | 0.231              | 0.309              | 1071.1             | 10.52              | 0.7907             | 22.04              | 0.812              | 6.35               | 7.04               | 1.246              | 29.89              | 9.91               | 111.46             | 39.53              | 162.78             | 30.25              | 247.5              | 44.59              | 6970               | 3.151              | 64.5               | 142.8              |
| oc03h10                  | Core     | 0.00142                        | 32.9             | n.d.    | 0.00446          | n.d.               | 0.233              | 490.6              | 1.45               | 0.0082             | 7.59               | 0.090              | 1.30               | 2.29               | 0.367              | 12.40              | 3.94               | 46.36              | 17.15              | 74.41              | 14.64              | 132.6              | 25.67              | 8726               | 0.391              | 25.6               | 29.4               |
| oc03h11                  | Core     | 0.00025                        | 32.9             | 0.04073 | 0.0045           | n.d.               | 0.327              | 896.0              | 0.63               | 0.0250             | 1.88               | 0.256              | 4.16               | 6.26               | 0.666              | 29.29              | 8.25               | 88.12              | 31.45              | 131.15             | 26.25              | 231.3              | 47.77              | 9544               | 0.199              | 24.1               | 37.8               |
| oc03h12                  | Core     | 0.00019                        | 32.9             | n.d.    | 0.00264          | 1.019              | 0.583              | 3018.5             | 1.01               | 0.0123             | 2.71               | 0.194              | 3.56               | 8.77               | 2.247              | 64.45              | 22.71              | 274.74             | 104.17             | 459.18             | 86.66              | 748.9              | 139.38             | 8515               | 0.532              | 78.6               | 121.3              |
| oc03h13                  | Core     | 0.00043                        | 32.9             | n.d.    | 0.00421          | 0.324              | 0.424              | 1090.1             | 1.27               | 0.0357             | 26.92              | 0.323              | 5.52               | 7.06               | 2.051              | 32.04              | 9.24               | 102.38             | 38.96              | 177.41             | 34.66              | 324.3              | 65.30              | 7178               | 0.419              | 66.6               | 66.9               |
| oc03i07                  | Rim      | n.d.                           | 32.9             | n.d.    | 0.00324          | n.d.               | 0.311              | 640.0              | 1.02               | 0.0055             | 21.06              | 0.071              | 1.31               | 2.81               | 0.921              | 14.04              | 4.47               | 53.75              | 21.21              | 98.73              | 21.06              | 200.2              | 41.68              | 8399               | 0.354              | 38.3               | 44.9               |
| oc03i08                  | Core     | 0.00045                        | 32.9             | n.d.    | 0.00359          | n.d.               | 0.202              | 580.8              | 1.86               | 0.0025             | 12.75              | 0.046              | 0.73               | 1.72               | 0.275              | 10.43              | 3.70               | 48.49              | 18.95              | 90.15              | 19.15              | 178.0              | 35.62              | 9488               | 0.676              | 51.3               | 93.4               |
| oc03i09                  | Core     | 0.00486                        | 32.9             | n.d.    | 0.00169          | 0.293              | 0.281              | 676.6              | 0.76               | 0.0631             | 7.94               | 0.208              | 3.60               | 5.05               | 0.317              | 20.84              | 6.45               | 66.77              | 23.20              | 97.41              | 18.81              | 167.0              | 31.46              | 10175              | 0.294              | 118.3              | 118.4              |
| oc03i10                  | Core     | 0.00051                        | 32.9             | n.d.    | 0.0031           | 0.441              | 0.185              | 936.9              | 0.80               | 0.0094             | 17.62              | 0.127              | 2.28               | 3.89               | 1.327              | 21.60              | 7.20               | 82.13              | 31.34              | 148.03             | 29.17              | 280.0              | 55.16              | 9021               | 0.328              | 49.6               | 58.9               |
| oc03i11                  | Core     | 0.00104                        | 32.9             | 0.02561 | 0.00196          | 0.322              | 0.266              | 685.9              | 1.20               | 0.0034             | 18.84              | 0.116              | 2.13               | 3.74               | 0.565              | 16.64              | 4.87               | 58.38              | 21.94              | 100.88             | 20.55              | 194.2              | 38.84              | 10834              | 0.606              | 63.1               | 136.5              |
| oc03i12                  | Core     | 0.00014                        | 32.9             | 0.04766 | 0.00176          | 0.320              | 0.252              | 900.7              | 4.72               | 0.0520             | 8.40               | 0.099              | 1.29               | 2.43               | 0.272              | 15.47              | 5.95               | 75.60              | 30.05              | 144.82             | 29.83              | 263.2              | 52.61              | 9492               | 2.039              | 67.6               | 155.9              |
| oc03j07                  | Rim      | 0.00035                        | 32.9             | n.d.    | 0.00472          | 0.253              | 0.509              | 639.1              | 1.29               | 1.9675             | 22.52              | 0.543              | 3.01               | 3.42               | 0.717              | 15.25              | 4.74               | 56.58              | 20.65              | 99.87              | 20.75              | 201.9              | 40.40              | 9050               | 0.513              | 76.9               | 142.6              |
| oc03j08                  | Core     | 0.00018                        | 32.9             | 0.04843 | 0.00325          | n.d.               | 0.307              | 649.6              | 1.28               | 0.0261             | 16.57              | 0.083              | 1.56               | 3.41               | 0.381              | 15.34              | 4.95               | 58.76              | 21.02              | 98.95              | 19.34              | 171.2              | 35.04              | 9518               | 0.534              | 88.0               | 146.0              |
| oc03j10                  | Core     | 0.00025                        | 32.9             | 0.07874 | 0.00323          | 0.346              | 0.936              | 1739.9             | 2.13               | 0.0716             | 40.81              | 0.389              | 5.85               | 9.05               | 1.903              | 37.54              | 11.90              | 140.67             | 55.28              | 267.19             | 55.58              | 540.3              | 113.44             | 8755               | 0.718              | 150.3              | 137.6              |
| oc03j11                  | Rim      | 0.0006                         | 32.9             | n.d.    | 0.00267          | 0.252              | 0.507              | 776.8              | 4.83               | 0.0111             | 7.42               | 0.045              | 0.87               | 1.92               | 0.235              | 12.39              | 5.10               | 64.81              | 26.69              | 126.37             | 25.85              | 237.3              | 47.50              | 9557               | 2.053              | 58.9               | 143.4              |
| oc03j12                  | Core     | n.d.                           | 32.9             | n.d.    | 0.00203          | n.d.               | 0.238              | 405.2              | 0.69               | 0.0024             | 14.31              | 0.031              | 0.62               | 1.34               | 0.331              | 7.33               | 2.60               | 33.46              | 13.02              | 66.73              | 14.53              | 145.6              | 30.59              | 9248               | 0.270              | 30.2               | 44.0               |
| oc03j13                  | Core     | 0.00042                        | 32.9             | n.d.    | 0.00213          | n.d.               | 0.199              | 363.9              | 0.55               | 0.0143             | 11.41              | 0.043              | 0.79               | 1.89               | 0.428              | 9.18               | 2.77               | 31.66              | 12.14              | 55.87              | 11.48              | 114.3              | 23.79              | 9532               | 0.219              | 26.8               | 42.5               |
| oc03k07                  | Rim      | 0.0003                         | 32.9             | n.d.    | 0.00319          | n.d.               | 0.198              | 452.8              | 1.11               | 0.0047             | 16.64              | 0.077              | 1.27               | 2.64               | 0.623              | 12.33              | 3.57               | 40.29              | 14.58              | 68.97              | 14.35              | 133.5              | 26.85              | 8968               | 0.356              | 49.7               | 69.1               |
| oc03k08                  | Core     | n.d.                           | 32.9             | n.d.    | 0.00082          | 0.266              | 0.244              | 381.9              | 0.82               | n.d.               | 9.76               | 0.013              | 0.28               | 0.69               | 0.282              | 4.35               | 1.73               | 24.47              | 11.08              | 67.09              | 17.16              | 204.9              | 49.30              | 11674              | 0.518              | 33.0               | 72.1               |
| oc03k09                  | Core     | 0.00053                        | 32.9             | n.d.    | 0.00148          | 0.446              | 0.280              | 684.0              | 1.19               | 0.0068             | 11.57              | 0.076              | 1.23               | 2.18               | 0.877              | 12.05              | 4.22               | 51.41              | 21.56              | 110.78             | 24.15              | 242.3              | 52.57              | 8376               | 0.473              | 27.2               | 61.9               |
| oc03k10                  | Core     | 0.00106                        | 32.9             | n.d.    | 0.00145          | n.d.               | 0.069              | 220.2              | 0.59               | n.d.               | 7.39               | 0.025              | 0.40               | 0.74               | 0.311              | 4.50               | 1.52               | 16.68              | 6.81               | 35.34              | 8.08               | 91.8               | 20.48              | 9104               | 0.138              | 16.6               | 43.7               |
| oc03k11                  | Rim      | 0.00069                        | 32.9             | n.d.    | 0.00296          | 0.234              | 0.212              | 481.9              | 1.16               | 0.0120             | 21.58              | 0.110              | 1.69               | 2.96               | 0.795              | 13.70              | 3.94               | 44.23              | 15.64              | 72.33              | 14.98              | 138.1              | 28.25              | 8846               | 0.378              | 56.2               | 70.7               |
| oc03k12                  | Rim      | n.d.                           | 32.9             | n.d.    | 0.00402          | 0.447              | 0.321              | 1516.7             | 1.33               | 0.1166             | 30.74              | 0.782              | 10.03              | 11.67              | 2.968              | 49.89              | 13.45              | 140.91             | 50.17              | 217.17             | 42.29              | 380.6              | 75.10              | 8847               | 0.486              | 162.7              | 142.5              |
| oc03k13                  | Core     | n.d.                           | 32.9             | n.d.    | 0.00216          | 0.338              | 0.283              | 803.5              | 2.79               | 0.0060             | 14.76              | 0.095              | 1.71               | 3.49               | 0.455              | 18.55              | 6.12               | 73.35              | 27.89              | 128.01             | 26.38              | 238.3              | 45.77              | 9527               | 0.814              | 81.7               | 66.3               |
| oc03l07                  | Core     | 0.00117                        | 32.9             | n.d.    | 0.00194          | 0.448              | 0.433              | 435.8              | 1.24               | 0.0520             | 22.11              | 0.053              | 0.78               | 1.74               | 0.237              | 8.14               | 2.86               | 35.86              | 14.13              | 71.12              | 15.33              | 149.2              | 31.21              | 10238              | 0.594              | 52.9               | 100.1              |
| oc03l08                  | Core     | 0.00017                        | 32.9             | n.d.    | 0.00103          | n.d.               | 0.141              | 313.1              | 0.10               | 0.0236             | 3.79               | 0.161              | 1.98               | 1.96               | 1.194              | 7.55               | 2.20               | 25.92              | 9.76               | 46.78              | 11.22              | 119.5              | 27.88              | 7213               | 0.111              | 24.2               | 39.1               |
| oc03l09                  | Core     | 0.00061                        | 32.9             | 0.03617 | 0.00225          | n.d.               | 0.195              | 503.4              | 0.49               | 0.0043             | 17.31              | 0.098              | 2.13               | 4.02               | 1.013              | 17.43              | 4.76               | 50.22              | 16.70              | 72.36              | 14.15              | 131.4              | 25.30              | 8993               | 0.236              | 40.0               | 50.0               |
| oc03l10                  | Core     | n.d.                           | 32.9             | n.d.    | 0.00156          | n.d.               | 0.297              | 975.5              | 0.58               | 0.0084             | 28.30              | 0.270              | 5.39               | 9.79               | 2.307              | 36.10              | 9.80               | 97.27              | 32.67              | 143.01             | 28.31              | 254.2              | 49.29              | 9552               | 0.268              | 95.9               | 94.9               |
| oc03l11                  | Rim      | 0.00035                        | 32.9             | n.d.    | 0.0017           | 0.254              | 0.356              | 723.7              | 0.37               | 0.0069             | 21.92              | 0.180              | 3.50               | 6.16               | 1.484              | 23.56              | 6.47               | 69.41              | 23.30              | 102.49             | 21.39              | 195.4              | 39.43              | 9527               | 0.287              | 63.4               | 71.0               |
| oc03l12                  | Core     | 0.00081                        | 32.9             | n.d.    | 0.00456          | 0.351              | 0.827              | 805.3              | 1.02               | 0.2751             | 34.01              | 0.706              | 7.98               | 10.20              | 2.194              | 32.53              | 8.33               | 81.74              | 26.38              | 108.83             | 21.08              | 191.5              | 35.63              | 9078               | 0.529              | 134.9              | 177.1              |
| oc03l13                  | Core     | 0.00075                        | 32.9             | n.d.    | 0.00289          | 0.330              | 0.321              | 687.8              | 0.85               | 0.0447             | 18.76              | 0.160              | 2.63               | 4.68               | 1.118              | 20.20              | 5.80               | 62.96              | 22.31              | 101.88             | 20.81              | 196.5              | 38.61              | 9106               | 0.366              | 79.0               | 84.3               |
| oc03m07                  | Rim      | 0.00017                        | 32.9             | n.d.    | 0.00135          | n.d.               | 0.243              | 330.1              | 1.17               | 0.0022             | 20.27              | 0.023              | 0.42               | 0.90               | 0.294              | 5.87               | 2.13               | 26.87              | 10.55              | 51.97              | 11.89              | 119.5              | 25.60              | 10747              | 0.459              | 62.4               | 104.5              |
| oc03m08                  | Core     | 0.00146                        | 32.9             | 0.02699 | 0.00051          | n.d.               | 0.141              | 126.1              | 0.13               | n.d.               | 0.46               | n.d.               | 0.06               | 0.15               | 0.161              | 1.38               | 0.69               | 9.36               | 4.06               | 22.17              | 5.18               | 53.4               | 12.78              | 8428               | 0.074              | 1.3                | 14.8               |
| oc03m09                  | Core     | 0.00214                        | 32.9             | n.d.    | 0.00101          | n.d.               | 0.287              | 918.4              | 5.75               | 0.0095             | 48.93              | 0.062              | 1.45               | 3.16               | 1.089              | 14.45              | 5.72               | 72.28              | 29.11              | 146.98             | 33.68              | 359.3              | 75.88              | 10956              | 1.853              | 141.0              | 237.8              |
| oc03m10                  | Rim      | 0.00042                        | 32.9             | n.d.    | 0.00115          | 0.489              | 0.895              | 876.3              | 6.72               | 0.5201             | 57.05              | 0.236              | 1.90               | 2.97               | 0.890              | 12.80              | 4.81               | 61.61              | 25.55              | 136.70             | 32.54              | 345.0              | 73.66              | 10457              | 2.191              | 195.0              | 294.1              |
| oc03m11                  | Core     | 0.00039                        | 32.9             | n.d.    | 0.0017           | n.d.               | 0.189              | 301.3              | 0.96               | 0.0010             | 4.02               | 0.027              | 0.47               | 1.02               | 0.214              | 6.19               | 2.00               | 26.13              | 9.91               | 46.88              | 9.69               | 90.6               | 18.70              | 8928               | 0.345              | 19.4               | 48.6               |
| oc03m12                  | Rim      | n.d.                           | 32.9             | n.d.    | 0.00215          | 0.352              | 0.316              | 491.8              | 1.26               | 0.0697             | 6.89               | 0.083              | 0.99               | 1.72               | 0.184              | 10.11              | 3.57               | 42.51              | 16.60              | 75.46              | 15.90              | 147.7              | 29.04              | 9907               | 0.673              | 39.6               | 92.1               |
| oc03m13                  | Core     | 0.00118                        | 32.9             | n.d.    | 0.001            | 0.335              | 0.263              | 842.4              | 0.89               | 0.0207             | 16.52              | 0.178              | 2.79               | 4.09               | 1.571              | 18.97              | 6.01               | 70.55              | 27.14              | 134.33             | 29.65              | 308.9              | 70.76              | 8276               | 0.283              | 69.2               | 80.6               |
| oc03n08                  | Core     | 0.00077                        | 32.9             | n.d.    | 0.00197          | n.d.               | 0.378              | 525.9              | 0.87               | 0.0027             | 19.81              | 0.057              | 1.43               | 2.09               | 0.481              | 11.52              | 3.55               | 46.36              | 17.08              | 80.39              | 15.73              | 151.6              | 31.35              | 10813              | 0.529              | 71.3               | 116.1              |
| oc03n09                  | Core     | 0.00076                        | 32.9             | n.d.    | 0.00129          | n.d.               | 0.248              | 424.4              | 0.77               | 0.0083             | 12.35              | 0.056              | 1.20               | 1.86               | 0.788              | 9.02               | 2.79               | 32.95              | 12.89              | 65.71              | 14.71              | 150.0              | 33.81              | 8353               | 0.233              | 47.2               | 85.0               |
| oc03n10                  | Core     | 0.00055                        | 32.9             | 0.02733 | 0.00143          | 0.375              | 0.599              | 852.1              | 1.43               | 1.7718             | 23.13              | 1.441              | 8.93               | 5.69               | 1.810</            |                    |                    |                    |                    |                    |                    |                    |                    |                    |                    |                    |                    |



**Table S3.** Element contents (bulk) of sample ZR229, as determined by LA-ICP-MS. Red figures indicate data from two analytical spots on the same grain.

| Isotopic mass | Location | Al2O3   | SiO2 | CaO   | TiO2    | Rb                 | Sr                 | Y                  | Nb                 | La                 | Ce                 | Pr                 | Nd                 | Sm                 | Eu                 | Gd                 | Tb                 | Dy                 | Ho                 | Er                 | Tm                 | Yb                 | Lu                 | Hf                 | Ta                 | Th                 | U       |
|---------------|----------|---------|------|-------|---------|--------------------|--------------------|--------------------|--------------------|--------------------|--------------------|--------------------|--------------------|--------------------|--------------------|--------------------|--------------------|--------------------|--------------------|--------------------|--------------------|--------------------|--------------------|--------------------|--------------------|--------------------|---------|
| Spot ID       |          | wt%     | wt%  | wt%   | wt%     | µg g <sup>-1</sup> |         |
| oc03a07       | Core     | 0.00766 | 32.9 | n.d.  | 0.00148 | 0.736              | 0.401              | 847.9              | 3.27               | 0.0043             | 12.23              | 0.025              | 0.71               | 2.20               | 0.126              | 14.22              | 5.71               | 75.47              | 29.42              | 137.49             | 28.57              | 280.8              | 55.11              | 10963              | 1.364              | 147.2              | 368.6   |
| oc03a08       | Core     | 0.00086 | 32.9 | n.d.  | 0.00104 | 0.280              | 0.353              | 1540.6             | 1.99               | 0.4007             | 12.72              | 0.436              | 5.54               | 8.70               | 0.777              | 38.03              | 13.03              | 152.58             | 55.03              | 239.00             | 46.06              | 412.3              | 79.05              | 8876               | 0.791              | 201.3              | 301.8   |
| oc03a09       | Rim      | 0.00017 | 32.9 | n.d.  | 0.00055 | 0.778              | 0.677              | 2375.0             | 17.93              | 0.3424             | 20.10              | 0.171              | 1.73               | 4.06               | 0.169              | 29.48              | 13.08              | 185.74             | 76.31              | 384.91             | 85.19              | 824.9              | 158.40             | 11260              | 10.763             | 699.4              | 2589.2  |
| oc03a10       | Rim      | 0.08084 | 32.9 | 0.349 | 0.00208 | 7.113              | 2.004              | 4649.8             | 40.28              | 0.2545             | 119.37             | 0.769              | 9.89               | 17.00              | 1.466              | 85.84              | 30.96              | 381.07             | 147.77             | 712.41             | 152.69             | 1406.3             | 263.09             | 9475               | 11.964             | 6989.9             | 5570.1  |
| oc03a11       | Rim      | 0.00022 | 32.9 | 0.133 | 0.0007  | 0.431              | 0.596              | 1054.5             | 4.16               | 5.1412             | 30.56              | 2.144              | 10.77              | 5.65               | 0.252              | 21.79              | 7.56               | 94.62              | 36.62              | 173.55             | 35.18              | 322.5              | 62.19              | 10397              | 1.624              | 271.0              | 557.5   |
| oc03a12       | Core     | 0.00017 | 32.9 | n.d.  | 0.00133 | 0.403              | 0.296              | 826.9              | 1.72               | 0.0135             | 10.08              | 0.059              | 1.26               | 2.97               | 0.261              | 17.02              | 6.05               | 72.87              | 27.87              | 129.17             | 26.21              | 249.8              | 48.59              | 8748               | 0.677              | 120.3              | 233.5   |
| oc03a13       | Core     | 0.00024 | 32.9 | 0.028 | 0.00047 | 0.518              | 0.435              | 1666.7             | 2.36               | 0.0086             | 18.75              | 0.128              | 3.23               | 7.31               | 0.261              | 39.16              | 13.52              | 157.83             | 57.36              | 261.78             | 51.59              | 458.7              | 86.49              | 10408              | 0.937              | 282.1              | 474.2   |
| oc03b07       | Core     | 0.00359 | 32.9 | 0.124 | 0.00026 | 1.065              | 1.049              | 3010.4             | 25.27              | 1.7286             | 20.97              | 1.146              | 6.98               | 6.26               | 0.190              | 35.80              | 16.85              | 234.75             | 98.24              | 487.84             | 107.58             | 1003.8             | 195.03             | 12113              | 15.501             | 604.4              | 3361.3  |
| oc03b08       | Core     | 0.03143 | 32.9 | 0.071 | 0.00054 | 1.354              | 0.697              | 2101.0             | 5.29               | 3.3734             | 35.09              | 1.456              | 10.13              | 9.87               | 0.480              | 47.73              | 16.17              | 194.13             | 73.28              | 327.40             | 63.92              | 582.8              | 110.43             | 9425               | 1.730              | 365.9              | 576.1   |
| oc03b09       | Rim      | n.d.    | 32.9 | n.d.  | 0.00148 | 0.324              | 0.331              | 964.7              | 1.70               | 0.0025             | 9.94               | 0.087              | 1.75               | 3.98               | 0.420              | 20.32              | 7.21               | 85.67              | 33.12              | 155.61             | 31.45              | 288.2              | 57.72              | 8602               | 0.656              | 113.3              | 209.8   |
| oc03b10       | Core     | 0.00141 | 32.9 | n.d.  | 0.00019 | 2.415              | 1.839              | 6801.8             | 37.56              | 2.1083             | 18.42              | 0.318              | 2.43               | 8.99               | 0.024              | 80.13              | 38.52              | 549.30             | 227.55             | 1114.55            | 233.05             | 2083.8             | 386.43             | 13551              | 18.799             | 1010.0             | 7723.4  |
| oc03b11       | Core     | 0.0006  | 32.9 | 0.026 | 0.00134 | 0.553              | 0.533              | 2071.6             | 3.59               | 0.4228             | 13.54              | 0.485              | 5.69               | 10.04              | 1.146              | 50.71              | 17.26              | 198.27             | 73.55              | 329.16             | 63.67              | 555.1              | 106.64             | 8580               | 1.129              | 257.2              | 413.2   |
| oc03b12       | Core     | 0.07957 | 32.9 | 0.580 | 0.00434 | 12.810             | 2.790              | 1286.8             | 2.47               | 13.7660            | 52.95              | 6.217              | 31.95              | 12.89              | 0.566              | 35.06              | 10.55              | 117.82             | 42.90              | 198.92             | 39.82              | 357.2              | 70.94              | 8473               | 1.075              | 185.5              | 397.1   |
| oc03b13       | Core     | 0.03959 | 32.9 | n.d.  | 0.00354 | 8.973              | 0.443              | 1749.8             | 1.41               | 0.0071             | 11.36              | 0.212              | 4.24               | 9.61               | 0.883              | 47.41              | 15.29              | 172.09             | 61.58              | 273.97             | 51.93              | 452.2              | 85.50              | 9026               | 0.578              | 177.5              | 266.3   |
| oc03c07       | Core     | 0.80781 | 32.9 | 2.030 | 0.00392 | 2.124              | 62.132             | 4656.4             | 41.17              | 260.934            | 926.79             | 116.467            | 624.14             | 241.59             | 4.907              | 269.63             | 63.15              | 572.23             | 171.45             | 760.07             | 151.09             | 1396.8             | 290.24             | 18034              | 39.032             | 4187.1             | 37589.1 |
| oc03c08       | Core     | 0.00109 | 32.9 | 0.231 | 0.00119 | 0.574              | 1.143              | 1758.1             | 2.46               | 19.0639            | 59.59              | 6.081              | 28.57              | 12.21              | 0.681              | 44.16              | 14.02              | 163.49             | 60.85              | 282.17             | 53.62              | 477.3              | 93.06              | 9148               | 0.876              | 220.9              | 363.9   |
| oc03c09       | Core     | 0.0005  | 32.9 | 0.047 | 0.00101 | 1.040              | 0.773              | 3528.8             | 3.52               | 1.0411             | 25.50              | 1.209              | 15.41              | 24.97              | 3.174              | 104.64             | 32.23              | 352.89             | 121.66             | 535.30             | 99.81              | 870.5              | 163.14             | 7983               | 1.024              | 584.6              | 599.7   |
| oc03c10       | Core     | 0.03291 | 32.9 | n.d.  | 0.00128 | 2.119              | 0.989              | 5089.1             | 7.87               | 0.3591             | 52.69              | 1.092              | 17.22              | 31.24              | 3.316              | 137.27             | 43.73              | 493.68             | 172.35             | 744.53             | 141.71             | 1223.2             | 227.07             | 8591               | 1.928              | 1268.9             | 1067.9  |
| oc03c11       | Rim      | 0.00021 | 32.9 | 0.040 | 0.00139 | n.d.               | 0.312              | 834.1              | 2.07               | 0.0034             | 10.04              | 0.067              | 1.44               | 3.40               | 0.314              | 17.57              | 6.08               | 73.51              | 27.80              | 130.78             | 26.50              | 250.2              | 49.06              | 8837               | 0.808              | 129.0              | 259.7   |
| oc03c12       | Core     | 0.13132 | 32.9 | 0.274 | 0.00054 | 10.550             | 1.658              | 2080.1             | 3.86               | 5.2048             | 34.82              | 2.472              | 15.48              | 13.47              | 1.094              | 53.84              | 17.25              | 200.17             | 70.52              | 317.30             | 62.10              | 549.1              | 105.24             | 8305               | 1.709              | 411.5              | 591.7   |
| oc03c13       | Rim      | 0.00616 | 32.9 | n.d.  | 0.00155 | 1.776              | 1.205              | 5644.0             | 8.84               | 0.0238             | 9.81               | 0.318              | 5.49               | 16.06              | 0.705              | 98.56              | 40.91              | 516.90             | 182.95             | 839.06             | 169.11             | 1518.4             | 296.39             | 10167              | 4.712              | 839.5              | 3455.2  |
| oc03d07       | Core     | 0.00513 | 32.9 | 0.186 | 0.00068 | 0.687              | 0.894              | 1112.9             | 3.96               | 6.7768             | 34.55              | 2.399              | 12.06              | 5.73               | 0.254              | 23.00              | 7.95               | 98.78              | 37.88              | 180.73             | 36.68              | 331.1              | 66.23              | 10337              | 1.581              | 239.3              | 483.4   |
| oc03d08       | Rim      | 0.00549 | 32.9 | 0.033 | 0.00029 | 0.781              | 1.008              | 1908.2             | 23.88              | 1.1111             | 17.40              | 0.598              | 2.90               | 3.99               | 0.060              | 24.89              | 11.49              | 162.31             | 64.75              | 320.76             | 69.29              | 640.5              | 124.61             | 11942              | 12.237             | 713.4              | 2420.9  |
| oc03d09       | Core     | 0.00015 | 32.9 | n.d.  | 0.00061 | 0.447              | 0.494              | 1765.5             | 2.13               | 0.0183             | 12.17              | 0.278              | 5.06               | 9.38               | 0.906              | 43.75              | 14.47              | 167.39             | 61.20              | 272.33             | 52.85              | 476.8              | 93.54              | 9088               | 0.859              | 224.1              | 350.0   |
| oc03d10       | Core     | 0.00044 | 32.9 | n.d.  | 0.00061 | n.d.               | 0.450              | 540.7              | 4.15               | 0.0043             | 6.05               | 0.017              | 0.29               | 0.97               | 0.059              | 7.37               | 3.19               | 44.42              | 18.57              | 94.38              | 19.92              | 190.0              | 39.28              | 11592              | 2.126              | 96.8               | 362.7   |
| oc03d11       | Core     | 0.16686 | 32.9 | 0.334 | 0.00526 | 9.458              | 1.477              | 2984.2             | 7.21               | 5.5802             | 57.74              | 3.736              | 25.70              | 20.99              | 1.305              | 76.46              | 24.77              | 277.87             | 103.42             | 467.52             | 94.14              | 823.3              | 158.75             | 8645               | 2.235              | 1258.1             | 1057.1  |
| oc03d12       | Core     | 0.04899 | 32.9 | 0.582 | 0.00161 | 5.573              | 1.786              | 3535.7             | 20.34              | 8.4657             | 52.96              | 5.868              | 32.30              | 17.79              | 0.440              | 59.60              | 22.54              | 291.37             | 113.37             | 553.46             | 118.70             | 1082.9             | 208.60             | 11428              | 10.264             | 1567.0             | 3540.5  |
| oc03d13       | Rim      | 0.00086 | 32.9 | 0.164 | 0.00064 | 0.905              | 0.970              | 2591.6             | 14.71              | 6.5349             | 40.01              | 3.229              | 16.44              | 9.70               | 0.603              | 39.57              | 15.10              | 199.63             | 80.31              | 401.38             | 87.22              | 845.8              | 165.99             | 10595              | 7.745              | 752.3              | 2395.3  |
| oc03e07       | Core     | 0.05518 | 32.9 | 0.201 | 0.00187 | 1.904              | 1.120              | 1981.4             | 2.86               | 3.0069             | 22.59              | 1.489              | 10.11              | 10.46              | 1.873              | 45.31              | 15.14              | 175.67             | 65.14              | 309.77             | 62.71              | 591.1              | 121.09             | 8320               | 1.089              | 430.7              | 740.4   |
| oc03e08       | Core     | 0.01246 | 32.9 | 0.228 | 0.00126 | 1.487              | 1.015              | 4045.6             | 17.76              | 4.8111             | 92.29              | 3.001              | 19.94              | 20.97              | 0.988              | 97.15              | 32.64              | 380.79             | 137.43             | 609.94             | 117.71             | 1016.8             | 191.35             | 8442               | 4.996              | 2227.6             | 2284.7  |
| oc03e09       | Core     | 0.71821 | 32.9 | 0.044 | 0.00275 | 14.991             | 1.217              | 1621.2             | 6.92               | 1.4192             | 23.80              | 0.741              | 6.26               | 8.05               | 0.506              | 36.63              | 12.10              | 145.98             | 53.96              | 256.57             | 49.91              | 450.6              | 88.13              | 9158               | 3.031              | 358.8              | 678.7   |
| oc03e10       | Core     | 0.02049 | 32.9 | 0.040 | 0.00258 | 0.595              | 0.528              | 1200.6             | 3.29               | 0.0938             | 11.58              | 0.145              | 2.28               | 4.85               | 0.482              | 24.85              | 8.95               | 108.45             | 41.39              | 195.71             | 39.71              | 361.5              | 74.00              | 7985               | 0.868              | 189.9              | 286.0   |
| oc03e11       | Core     | 0.00014 | 32.9 | 0.054 | 0.00056 | 0.704              | 0.670              | 2473.8             | 6.29               | 2.9238             | 24.62              | 1.512              | 9.00               | 9.11               | 0.379              | 44.05              | 17.03              | 210.38             | 82.74              | 394.11             | 78.52              | 712.3              | 136.37             | 10766              | 3.250              | 534.0              | 1392.9  |
| oc03e12       | Core     | 0.00544 | 32.9 | 0.047 | 0.00046 | 2.158              | 2.027              | 5885.6             | 99.47              | 0.1177             | 21.18              | 0.281              | 2.89               | 8.07               | 0.285              | 71.11              | 34.56              | 498.42             | 205.16             | 1018.49            | 204.91             | 1806.5             | 343.72             | 15434              | 32.079             | 742.5              | 8056.9  |
| oc03e13       | Core     | 0.03444 | 32.9 | 0.058 | 0.00192 | 2.032              | 3.857              | 3385.9             | 37.54              | 0.3895             | 11.19              | 0.495              | 3.44               | 4.20               | 0.562              | 31.38              | 15.53              | 236.05             | 113.06             | 654.00             | 156.30             | 1512.5             | 310.78             | 17004              | 20.230             | 530.3              | 5752.8  |
| oc03f07       | Rim      | n.d.    | 32.9 | 0.079 | 0.00067 | n.d.               | 0.397              | 969.6              | 2.88               | 0.8102             | 16.05              | 0.441              | 3.06               | 4.04               | 0.367              | 19.24              | 6.97               | 84.83              | 32.27              | 155.30             | 31.57              | 292.9              | 60.09              | 9153               | 0.989              | 171.4              | 308.1   |
| oc03f08       | Core     | 0.18248 | 32.9 | 0.049 | 0.0043  | 3.691              | 1.134              | 1504.4             | 1.44               | 0.9138             | 9.30               | 0.430              | 4.78               | 7.83               | 0.868              | 38.18              | 12.39              | 144.47             | 52.81              | 240.98             | 45.71              | 403.6              | 78.07              | 8250               | 0.447              | 139.5              | 225.5   |
| oc03f09       | Rim      | 0.01724 | 32.9 | n.d.  | 0.0012  | 1.964              | 0.577              | 1123.7             | 5.96               | 0.0391             | 16.24              | 0.076              | 1.34               | 3.24               | 0.153              | 19.49              | 7.28               | 95.20              | 37.26              | 190.64             | 40.19              | 376.1              | 78.32              | 11166              | 3.060              | 291.7              | 906.2   |
| oc03f10       | Rim      | 0.14926 | 32.9 | 0.647 | 0.00056 | 5.376              | 1.747              | 1827.1             | 15.72              | 17.2310            | 74.78              | 7.917              | 40.72              | 16.06              | 0.376              | 41.65              | 13.49              | 159.80             | 60.61              | 293.04             | 60.65              | 540.0              | 104.72             | 11197              | 7.497              | 649.3              | 1517.8  |
| oc03f11       | Rim      | 0.07207 | 32.9 | 0.048 | 0.00439 | 16.420             | 1.523              | 5860.2             | 25.48              | 0.2251             | 25.52              | 0.448              | 6.38               | 16.59              | 0.319              | 99.31              | 39.44              | 502.97             | 189.57             | 886.08             | 184.15             | 1612.4             | 298.44             | 10270              | 11.767             | 2002.6             | 5108.7  |
| oc03f12       | Core     | 0.01462 | 32.9 | n.d.  | 0.00111 | 0.839              | 0.480              | 2018.1             | 10.85              | 0.0201             | 8.60               | 0.103              | 2.07               | 6.21               | 0.262              | 40.61              | 15.12              | 175.65             | 64.26              | 306.21             | 63.5               |                    |                    |                    |                    |                    |         |

**Table S4.** Element contents (bulk) of sample Can1, as determined by LA-ICP-MS. Red figures indicate data from two analytical spots on the same grain.

| Isotopic mass<br>Spot ID | Location | Al2O3     | SiO2      | CaO       | TiO2      | Rb                       | Sr                       | Y                        | Nb                       | La                        | Ce                        | Pr                        | Nd                        | Sm                        | Eu                        | Gd                        | Tb                        | Dy                        | Ho                        | Er                        | Tm                        | Yb                        | Lu                        | Hf                        | Ta                        | Th                        | U                         |
|--------------------------|----------|-----------|-----------|-----------|-----------|--------------------------|--------------------------|--------------------------|--------------------------|---------------------------|---------------------------|---------------------------|---------------------------|---------------------------|---------------------------|---------------------------|---------------------------|---------------------------|---------------------------|---------------------------|---------------------------|---------------------------|---------------------------|---------------------------|---------------------------|---------------------------|---------------------------|
|                          |          | 27<br>wt% | 29<br>wt% | 42<br>wt% | 49<br>wt% | 85<br>µg g <sup>-1</sup> | 88<br>µg g <sup>-1</sup> | 89<br>µg g <sup>-1</sup> | 93<br>µg g <sup>-1</sup> | 139<br>µg g <sup>-1</sup> | 140<br>µg g <sup>-1</sup> | 141<br>µg g <sup>-1</sup> | 143<br>µg g <sup>-1</sup> | 147<br>µg g <sup>-1</sup> | 151<br>µg g <sup>-1</sup> | 157<br>µg g <sup>-1</sup> | 159<br>µg g <sup>-1</sup> | 163<br>µg g <sup>-1</sup> | 165<br>µg g <sup>-1</sup> | 166<br>µg g <sup>-1</sup> | 169<br>µg g <sup>-1</sup> | 172<br>µg g <sup>-1</sup> | 175<br>µg g <sup>-1</sup> | 178<br>µg g <sup>-1</sup> | 181<br>µg g <sup>-1</sup> | 232<br>µg g <sup>-1</sup> | 238<br>µg g <sup>-1</sup> |
| oc03h07                  | Rim      | 0.01023   | 32.9      | 0.024     | 0.00344   | 0.438                    | 0.390                    | 1422.6                   | 0.73                     | 0.0052                    | 1.98                      | 0.147                     | 2.76                      | 6.53                      | 0.129                     | 35.20                     | 11.36                     | 129.38                    | 48.33                     | 219.80                    | 42.46                     | 382.2                     | 76.48                     | 10012                     | 0.296                     | 53.4                      | 97.0                      |
| oc03h08                  | Core     | n.d.      | 32.9      | n.d.      | 0.00165   | 0.425                    | 0.271                    | 1010.8                   | 0.37                     | 0.0087                    | 6.78                      | 0.170                     | 3.52                      | 6.31                      | 1.461                     | 27.67                     | 8.76                      | 96.38                     | 33.81                     | 144.55                    | 29.07                     | 247.4                     | 48.05                     | 8505                      | 0.127                     | 78.3                      | 93.0                      |
| oc03h09                  | Core     | 0.00014   | 32.9      | n.d.      | 0.00093   | 0.231                    | 0.309                    | 1071.1                   | 10.52                    | 0.7907                    | 22.04                     | 0.812                     | 6.35                      | 7.04                      | 1.246                     | 29.89                     | 9.91                      | 111.46                    | 39.53                     | 162.78                    | 30.25                     | 247.5                     | 44.59                     | 6970                      | 3.151                     | 64.5                      | 142.8                     |
| oc03h10                  | Core     | 0.00142   | 32.9      | n.d.      | 0.00446   | n.d.                     | 0.233                    | 490.6                    | 1.45                     | 0.0082                    | 7.59                      | 0.090                     | 1.30                      | 2.29                      | 0.367                     | 12.40                     | 3.94                      | 46.36                     | 17.15                     | 74.41                     | 14.64                     | 132.6                     | 25.67                     | 8726                      | 0.391                     | 25.6                      | 29.4                      |
| oc03h11                  | Core     | 0.02434   | 32.9      | 0.027     | 0.00436   | 0.953                    | 0.641                    | 824.7                    | 0.64                     | 0.0220                    | 1.76                      | 0.222                     | 3.68                      | 5.86                      | 0.631                     | 27.03                     | 7.55                      | 80.74                     | 28.63                     | 120.96                    | 24.21                     | 212.7                     | 44.25                     | 9315                      | 0.179                     | 22.3                      | 35.4                      |
| oc03h12                  | Core     | 0.00019   | 32.9      | n.d.      | 0.00264   | 1.019                    | 0.583                    | 3018.5                   | 1.01                     | 0.0123                    | 2.71                      | 0.194                     | 3.56                      | 8.77                      | 2.247                     | 64.45                     | 22.71                     | 274.74                    | 104.17                    | 459.18                    | 86.66                     | 748.9                     | 139.38                    | 8515                      | 0.532                     | 78.6                      | 121.3                     |
| oc03h13                  | Core     | 0.00033   | 32.9      | n.d.      | 0.00461   | n.d.                     | 0.347                    | 1200.3                   | 1.44                     | 0.3525                    | 28.42                     | 0.455                     | 6.07                      | 7.63                      | 2.205                     | 33.36                     | 9.96                      | 110.48                    | 41.23                     | 190.73                    | 37.21                     | 347.6                     | 71.99                     | 7184                      | 0.483                     | 73.2                      | 73.5                      |
| oc03i07                  | Rim      | n.d.      | 32.9      | n.d.      | 0.00324   | n.d.                     | 0.311                    | 640.0                    | 1.02                     | 0.0055                    | 21.06                     | 0.071                     | 1.31                      | 2.81                      | 0.921                     | 14.04                     | 4.47                      | 53.75                     | 21.21                     | 98.73                     | 21.06                     | 200.2                     | 41.68                     | 8399                      | 0.354                     | 38.3                      | 44.9                      |
| oc03i08                  | Core     | 0.00045   | 32.9      | n.d.      | 0.00359   | n.d.                     | 0.202                    | 580.8                    | 1.86                     | 0.0025                    | 12.75                     | 0.046                     | 0.73                      | 1.72                      | 0.275                     | 10.43                     | 3.70                      | 48.49                     | 18.95                     | 90.15                     | 19.15                     | 178.0                     | 35.62                     | 9488                      | 0.676                     | 51.3                      | 93.4                      |
| oc03i09                  | Core     | 0.00486   | 32.9      | n.d.      | 0.00169   | 0.293                    | 0.281                    | 676.6                    | 0.76                     | 0.0631                    | 7.94                      | 0.208                     | 3.60                      | 5.05                      | 0.317                     | 20.84                     | 6.45                      | 66.77                     | 23.20                     | 97.41                     | 18.81                     | 167.0                     | 31.46                     | 10175                     | 0.294                     | 118.3                     | 118.4                     |
| oc03i10                  | Core     | 0.00133   | 32.9      | n.d.      | 0.00454   | 0.454                    | 0.403                    | 1147.4                   | 1.06                     | 0.6194                    | 20.13                     | 0.617                     | 5.32                      | 6.84                      | 2.270                     | 29.23                     | 9.47                      | 110.64                    | 40.48                     | 188.52                    | 37.62                     | 344.7                     | 67.18                     | 8356                      | 0.362                     | 90.2                      | 68.7                      |
| oc03i11                  | Core     | 0.00104   | 32.9      | 0.026     | 0.00196   | 0.322                    | 0.266                    | 685.9                    | 1.20                     | 0.0034                    | 18.84                     | 0.116                     | 2.13                      | 3.74                      | 0.565                     | 16.64                     | 4.87                      | 58.38                     | 21.94                     | 100.88                    | 20.55                     | 194.2                     | 37.84                     | 10834                     | 0.666                     | 63.1                      | 136.5                     |
| oc03i12                  | Core     | 0.00014   | 32.9      | 0.048     | 0.00176   | 0.320                    | 0.252                    | 900.7                    | 4.72                     | 0.0520                    | 8.40                      | 0.099                     | 1.29                      | 2.43                      | 0.272                     | 15.47                     | 5.95                      | 75.60                     | 30.05                     | 144.82                    | 29.83                     | 263.2                     | 52.61                     | 9492                      | 2.039                     | 67.6                      | 155.9                     |
| oc03j07                  | Rim      | 0.00035   | 32.9      | n.d.      | 0.00472   | 0.253                    | 0.509                    | 639.1                    | 1.29                     | 1.9675                    | 22.52                     | 0.543                     | 3.01                      | 3.42                      | 0.717                     | 15.25                     | 4.74                      | 56.58                     | 20.65                     | 99.87                     | 20.75                     | 201.9                     | 40.40                     | 9050                      | 0.513                     | 76.9                      | 142.6                     |
| oc03j08                  | Core     | 0.00018   | 32.9      | 0.048     | 0.00325   | n.d.                     | 0.307                    | 649.6                    | 1.28                     | 0.0261                    | 16.57                     | 0.083                     | 1.56                      | 3.41                      | 0.381                     | 15.34                     | 4.95                      | 58.76                     | 21.02                     | 98.95                     | 19.34                     | 171.2                     | 35.04                     | 9518                      | 0.534                     | 88.0                      | 146.0                     |
| oc03j10                  | Core     | 0.00025   | 32.9      | 0.079     | 0.00323   | 0.346                    | 0.936                    | 1739.9                   | 2.13                     | 0.0716                    | 40.81                     | 0.389                     | 5.85                      | 9.05                      | 1.903                     | 37.54                     | 11.90                     | 140.67                    | 55.28                     | 267.19                    | 55.58                     | 540.3                     | 113.44                    | 8755                      | 0.718                     | 150.3                     | 137.6                     |
| oc03j11                  | Rim      | 0.0006    | 32.9      | n.d.      | 0.00267   | 0.252                    | 0.507                    | 776.8                    | 4.83                     | 0.0111                    | 7.42                      | 0.045                     | 0.87                      | 1.92                      | 0.235                     | 12.39                     | 5.10                      | 64.81                     | 26.69                     | 126.37                    | 25.85                     | 237.3                     | 47.50                     | 9557                      | 2.053                     | 58.9                      | 143.4                     |
| oc03j12                  | Core     | n.d.      | 32.9      | n.d.      | 0.00203   | n.d.                     | 0.238                    | 405.2                    | 0.69                     | 0.0024                    | 14.31                     | 0.031                     | 0.62                      | 1.34                      | 0.331                     | 7.33                      | 2.60                      | 33.46                     | 13.02                     | 66.73                     | 14.53                     | 145.6                     | 30.59                     | 9248                      | 0.270                     | 30.2                      | 44.0                      |
| oc03j13                  | Core     | 0.00048   | 32.9      | n.d.      | 0.00208   | n.d.                     | 0.189                    | 360.7                    | 0.53                     | 0.0185                    | 11.19                     | 0.041                     | 0.76                      | 1.74                      | 0.422                     | 8.71                      | 2.71                      | 30.72                     | 12.01                     | 54.63                     | 11.39                     | 113.4                     | 23.26                     | 9389                      | 0.222                     | 26.7                      | 42.4                      |
| oc03k07                  | Rim      | 0.0003    | 32.9      | n.d.      | 0.00319   | n.d.                     | 0.198                    | 452.8                    | 1.11                     | 0.0047                    | 16.64                     | 0.077                     | 1.27                      | 2.64                      | 0.623                     | 12.33                     | 3.57                      | 40.29                     | 14.58                     | 68.97                     | 14.35                     | 133.5                     | 26.85                     | 8968                      | 0.356                     | 49.7                      | 69.1                      |
| oc03k08                  | Core     | n.d.      | 32.9      | n.d.      | 0.00082   | 0.266                    | 0.244                    | 381.9                    | 0.82                     | n.d.                      | 9.76                      | 0.013                     | 0.28                      | 0.69                      | 0.282                     | 4.35                      | 1.73                      | 24.47                     | 11.08                     | 67.09                     | 17.16                     | 204.9                     | 49.30                     | 11674                     | 0.518                     | 33.0                      | 72.1                      |
| oc03k09                  | Core     | 0.00053   | 32.9      | n.d.      | 0.00148   | 0.446                    | 0.280                    | 684.0                    | 1.19                     | 0.0068                    | 11.57                     | 0.076                     | 1.23                      | 2.18                      | 0.877                     | 12.05                     | 4.22                      | 51.41                     | 21.56                     | 110.78                    | 24.15                     | 242.3                     | 52.57                     | 8376                      | 0.473                     | 27.2                      | 61.9                      |
| oc03k10                  | Core     | 0.00103   | 32.9      | 0.092     | 0.00123   | n.d.                     | 0.793                    | 211.3                    | 0.44                     | 1.2997                    | 9.58                      | 0.346                     | 1.47                      | 0.86                      | 0.356                     | 4.33                      | 1.40                      | 15.69                     | 6.49                      | 33.95                     | 7.78                      | 83.9                      | 19.14                     | 9158                      | 0.232                     | 15.9                      | 41.7                      |
| oc03k11                  | Rim      | 0.00069   | 32.9      | n.d.      | 0.00296   | 0.234                    | 0.212                    | 481.9                    | 1.16                     | 0.0120                    | 21.58                     | 0.110                     | 1.69                      | 2.96                      | 0.795                     | 13.70                     | 3.94                      | 44.23                     | 15.64                     | 72.33                     | 14.98                     | 138.1                     | 28.25                     | 8846                      | 0.378                     | 56.2                      | 70.7                      |
| oc03k12                  | Rim      | 0.00015   | 32.9      | n.d.      | 0.00343   | 0.415                    | 0.345                    | 1310.9                   | 1.08                     | 0.4754                    | 28.86                     | 0.878                     | 9.39                      | 11.02                     | 2.613                     | 41.47                     | 11.70                     | 124.44                    | 43.13                     | 190.52                    | 37.42                     | 328.2                     | 64.98                     | 8163                      | 0.455                     | 145.7                     | 128.9                     |
| oc03k13                  | Core     | n.d.      | 32.9      | n.d.      | 0.00216   | 0.338                    | 0.283                    | 803.5                    | 2.79                     | 0.0060                    | 14.76                     | 0.095                     | 1.71                      | 3.49                      | 0.455                     | 18.55                     | 6.12                      | 73.35                     | 27.89                     | 128.01                    | 26.38                     | 238.3                     | 45.77                     | 9527                      | 0.814                     | 81.7                      | 66.3                      |
| oc03l07                  | Core     | 0.00117   | 32.9      | n.d.      | 0.00194   | 0.448                    | 0.433                    | 435.8                    | 1.24                     | 0.0520                    | 22.11                     | 0.053                     | 0.78                      | 1.74                      | 0.237                     | 8.14                      | 2.86                      | 35.86                     | 14.13                     | 71.12                     | 15.33                     | 149.2                     | 31.21                     | 10238                     | 0.594                     | 52.9                      | 100.1                     |
| oc03l08                  | Core     | 0.00017   | 32.9      | n.d.      | 0.00103   | n.d.                     | 0.141                    | 313.1                    | 0.10                     | 0.0236                    | 3.79                      | 0.161                     | 1.98                      | 1.96                      | 1.194                     | 7.55                      | 2.20                      | 25.92                     | 9.76                      | 46.78                     | 11.22                     | 119.5                     | 27.88                     | 7213                      | 0.111                     | 24.2                      | 39.1                      |
| oc03l09                  | Core     | 0.00061   | 32.9      | 0.036     | 0.00225   | n.d.                     | 0.195                    | 503.4                    | 0.49                     | 0.0043                    | 17.31                     | 0.098                     | 2.13                      | 4.02                      | 1.013                     | 17.43                     | 4.76                      | 50.22                     | 16.70                     | 72.36                     | 14.15                     | 131.4                     | 25.30                     | 8993                      | 0.236                     | 40.0                      | 50.0                      |
| oc03l10                  | Core     | n.d.      | 32.9      | n.d.      | 0.00156   | n.d.                     | 0.297                    | 975.5                    | 0.58                     | 0.0084                    | 28.30                     | 0.270                     | 5.39                      | 9.79                      | 2.307                     | 36.10                     | 9.80                      | 97.27                     | 32.67                     | 143.01                    | 28.31                     | 254.2                     | 49.29                     | 9552                      | 0.268                     | 95.9                      | 94.9                      |
| oc03l11                  | Rim      | 0.00043   | 32.9      | n.d.      | 0.00167   | 0.231                    | 0.320                    | 690.5                    | 0.46                     | 0.0072                    | 20.62                     | 0.172                     | 3.34                      | 5.75                      | 1.370                     | 22.21                     | 6.16                      | 66.13                     | 22.16                     | 98.65                     | 20.44                     | 186.6                     | 37.69                     | 9073                      | 0.265                     | 60.0                      | 68.9                      |
| oc03l12                  | Core     | 0.00081   | 32.9      | n.d.      | 0.00456   | 0.351                    | 0.827                    | 805.3                    | 1.02                     | 0.2751                    | 34.01                     | 0.706                     | 7.98                      | 10.20                     | 2.194                     | 32.53                     | 8.33                      | 81.74                     | 26.38                     | 108.83                    | 21.08                     | 191.5                     | 35.63                     | 9078                      | 0.529                     | 134.9                     | 177.1                     |
| oc03l13                  | Core     | 0.00075   | 32.9      | n.d.      | 0.00289   | 0.330                    | 0.321                    | 687.8                    | 0.85                     | 0.0447                    | 18.76                     | 0.160                     | 2.63                      | 4.68                      | 1.118                     | 20.20                     | 5.80                      | 62.96                     | 22.31                     | 101.88                    | 20.81                     | 196.5                     | 38.61                     | 9106                      | 0.366                     | 79.0                      | 84.3                      |
| oc03m07                  | Rim      | 0.00017   | 32.9      | n.d.      | 0.00135   | n.d.                     | 0.243                    | 330.1                    | 1.17                     | 0.0022                    | 20.27                     | 0.023                     | 0.42                      | 0.90                      | 0.294                     | 5.87                      | 2.13                      | 26.87                     | 10.55                     | 51.97                     | 11.89                     | 119.5                     | 25.60                     | 10747                     | 0.459                     | 62.4                      | 104.5                     |
| oc03m08                  | Core     | 0.00146   | 32.9      | 0.027     | 0.00051   | n.d.                     | 0.141                    | 126.1                    | 0.13                     | n.d.                      | 0.46                      | n.d.                      | 0.06                      | 0.15                      | 0.161                     | 1.38                      | 0.69                      | 9.36                      | 4.06                      | 22.17                     | 5.18                      | 53.4                      | 12.78                     | 8428                      | 0.074                     | 1.3                       | 14.8                      |
| oc03m09                  | Core     | 0.00234   | 32.9      | 0.027     | 0.00195   | 0.632                    | 0.707                    | 1698.7                   | 11.66                    | 0.1070                    | 80.01                     | 0.365                     | 4.36                      | 8.26                      | 2.831                     | 36.80                     | 12.81                     | 159.00                    | 56.50                     | 269.29                    | 56.65                     | 528.0                     | 98.34                     | 9459                      | 2.679                     | 403.7                     | 292.7                     |
| oc03m10                  | Rim      | 0.00172   | 32.9      | n.d.      | 0.00118   | 0.353                    | 0.902                    | 852.1                    | 6.92                     | 0.4470                    | 56.61                     | 0.223                     | 1.82                      | 2.92                      | 0.881                     | 12.78                     | 4.77                      | 61.10                     | 25.20                     | 132.32                    | 31.38                     | 328.2                     | 69.60                     | 10291                     | 2.168                     | 187.7                     | 285.3                     |
| oc03m11                  | Core     | 0.00039   | 32.9      | n.d.      | 0.0017    | n.d.                     | 0.189                    | 301.3                    | 0.96                     | 0.0010                    | 4.02                      | 0.027                     | 0.47                      | 1.02                      | 0.214                     | 6.19                      | 2.00                      | 26.13                     | 9.91                      | 46.88                     | 9.69                      | 90.6                      | 18.70                     | 8928                      | 0.345                     | 19.4                      | 48.6                      |
| oc03m12                  | Rim      | 0.00022   | 32.9      | n.d.      | 0.00174   | 0.268                    | 0.326                    | 489.9                    | 1.65                     | 0.1741                    | 6.70                      | 0.137                     | 1.50                      | 1.93                      | 0.267                     | 10.25                     | 3.48                      | 41.93                     | 15.91                     | 74.41                     | 15.53                     | 143.2                     | 28.07                     | 9200                      | 0.701                     | 40.2                      | 90.6                      |
| oc03m13                  | Core     | 0.00118   | 32.9      | n.d.      | 0.001     | 0.335                    | 0.263                    | 842.4                    | 0.89                     | 0.0207                    | 16.52                     | 0.178                     | 2.79                      | 4.09                      | 1.571                     | 18.97                     | 6.01                      | 70.55                     | 27.14                     | 134.33                    | 29.65                     | 308.9                     | 70.76                     | 8276                      | 0.283                     | 69.2                      | 80.6                      |
| oc03n08                  | Core     | 0.01868   | 32.9      | 3.639     | 0.00243   | 0.301                    | 34.088                   | 530.9                    | 0.87                     | 76.485                    | 204.50                    | 25.552                    | 122.58                    | 23.30                     | 2.335                     | 28.29                     | 5.85                      | 52.80                     | 17.71                     | 79.18                     | 15.26                     | 145.8                     | 28.98                     | 9861                      | 0.474                     | 65.9                      | 102.5                     |
| oc03n09                  | Core     | 0.00076   | 32.9      | n.d.      | 0.00129   | n.d.                     | 0.248                    | 424.4                    | 0.77                     | 0.0083                    | 12.35                     | 0.056                     | 1.20                      | 1.86                      | 0.788                     | 9.02                      | 2.79                      | 32.95                     | 12.89                     | 65.71                     | 14.71                     | 150.0                     | 33.81                     | 8353                      | 0.233                     | 47.2                      | 85.0                      |
| oc03n10                  | Core     | 0.000     |           |           |           |                          |                          |                          |                          |                           |                           |                           |                           |                           |                           |                           |                           |                           |                           |                           |                           |                           |                           |                           |                           |                           |                           |

**Table S5.** Results of OSL decay curve decomposition into up to three components. For further details, see main text.

| ZR229  |                               |                               | ZR229-PH                      |        |                               | Can1                          |                               |        |                               |                               |                               |
|--------|-------------------------------|-------------------------------|-------------------------------|--------|-------------------------------|-------------------------------|-------------------------------|--------|-------------------------------|-------------------------------|-------------------------------|
| Hole # | Comp. 1<br>[cm <sup>2</sup> ] | Comp. 2<br>[cm <sup>2</sup> ] | Comp. 3<br>[cm <sup>2</sup> ] | Hole # | Comp. 1<br>[cm <sup>2</sup> ] | Comp. 2<br>[cm <sup>2</sup> ] | Comp. 3<br>[cm <sup>2</sup> ] | Hole # | Comp. 1<br>[cm <sup>2</sup> ] | Comp. 2<br>[cm <sup>2</sup> ] | Comp. 3<br>[cm <sup>2</sup> ] |
| 1      | 3.19E-19                      | 1.23E-21                      | NA                            | 1      | NA                            | NA                            | NA                            | 1      | 1.25E-19                      | 8.01E-21                      | NA                            |
| 2      | 7.86E-21                      | NA                            | NA                            | 2      | 1.58E-19                      | 7.15E-21                      | NA                            | 2      | 1.68E-19                      | NA                            | NA                            |
| 3      | 6.64E-20                      | 2.64E-21                      | NA                            | 3      | 4.58E-21                      | NA                            | NA                            | 3      | 1.24E-19                      | 2.55E-21                      | NA                            |
| 4      | 2.96E-19                      | 1.77E-21                      | NA                            | 4      | 1.96E-19                      | 5.40E-20                      | 6.20E-21                      | 4      | 6.70E-20                      | 3.67E-21                      | NA                            |
| 5      | NA                            | NA                            | NA                            | 5      | 8.90E-20                      | 8.93E-21                      | NA                            | 5      | 8.37E-20                      | 1.59E-21                      | NA                            |
| 6      | 1.32E-19                      | 1.36E-21                      | NA                            | 6      | 9.85E-21                      | NA                            | NA                            | 6      | 3.19E-21                      | NA                            | NA                            |
| 7      | NA                            | NA                            | NA                            | 7      | 1.70E-19                      | 4.87E-21                      | NA                            | 7      | 2.48E-19                      | 5.84E-21                      | NA                            |
| 8      | 5.24E-22                      | NA                            | NA                            | 8      | 2.74E-20                      | NA                            | NA                            | 8      | 1.70E-19                      | 6.39E-21                      | NA                            |
| 9      | 1.72E-19                      | 5.68E-21                      | NA                            | 9      | 2.14E-19                      | 7.15E-21                      | NA                            | 9      | 1.46E-19                      | 3.32E-21                      | NA                            |
| 10     | 1.15E-21                      | NA                            | NA                            | 10     | 1.00E-19                      | 4.75E-21                      | NA                            | 10     | 9.93E-20                      | 2.05E-21                      | NA                            |
| 11     | 1.77E-19                      | 3.88E-21                      | NA                            | 11     | 6.98E-21                      | NA                            | NA                            | 11     | 2.40E-22                      | NA                            | NA                            |
| 12     | 1.64E-19                      | 7.52E-21                      | NA                            | 12     | 1.12E-19                      | 1.16E-20                      | NA                            | 12     | 9.19E-21                      | NA                            | NA                            |
| 13     | 2.65E-19                      | 4.75E-20                      | 3.53E-21                      | 13     | 1.18E-20                      | NA                            | NA                            | 13     | 5.86E-21                      | NA                            | NA                            |
| 14     | 9.82E-20                      | 2.43E-21                      | NA                            | 14     | 1.88E-19                      | 9.15E-21                      | NA                            | 14     | 1.98E-19                      | 1.10E-20                      | NA                            |
| 15     | 2.63E-19                      | 8.42E-21                      | NA                            | 15     | 1.95E-19                      | 5.75E-21                      | NA                            | 15     | 4.84E-21                      | NA                            | NA                            |
| 16     | 1.38E-19                      | 6.84E-21                      | NA                            | 16     | 1.40E-19                      | 1.06E-20                      | NA                            | 16     | 1.80E-19                      | 1.05E-20                      | NA                            |
| 17     | 9.80E-20                      | 3.94E-21                      | NA                            | 17     | 1.20E-19                      | 4.17E-21                      | NA                            | 17     | 1.27E-19                      | 1.07E-20                      | NA                            |
| 18     | 1.45E-19                      | 3.73E-21                      | NA                            | 18     | 7.94E-20                      | 1.35E-21                      | NA                            | 18     | 2.44E-19                      | 2.52E-20                      | 1.31E-21                      |
| 19     | 6.57E-21                      | NA                            | NA                            | 19     | 3.00E-20                      | 7.14E-21                      | NA                            | 19     | 1.97E-19                      | 4.57E-21                      | NA                            |
| 20     | 6.29E-21                      | NA                            | NA                            | 20     | 1.47E-19                      | 7.81E-21                      | NA                            | 20     | 5.19E-20                      | 5.06E-22                      | NA                            |
| 21     | 8.55E-20                      | NA                            | NA                            | 21     | NA                            | NA                            | NA                            | 21     | 4.12E-21                      | NA                            | NA                            |
| 22     | 5.24E-21                      | NA                            | NA                            | 22     | 7.26E-20                      | NA                            | NA                            | 22     | 1.02E-19                      | 5.11E-21                      | NA                            |
| 23     | 1.20E-19                      | 1.51E-21                      | NA                            | 23     | 1.51E-19                      | 6.10E-21                      | NA                            | 23     | 7.09E-20                      | 2.02E-20                      | 3.68E-21                      |
| 24     | 2.17E-19                      | 1.69E-21                      | NA                            | 24     | 8.77E-20                      | 4.88E-21                      | NA                            | 24     | 1.05E-19                      | 5.23E-21                      | NA                            |
| 25     | 1.74E-19                      | 4.12E-21                      | NA                            | 25     | 2.06E-19                      | 1.03E-20                      | NA                            | 25     | 2.37E-19                      | 1.14E-20                      | NA                            |
| 26     | 1.17E-19                      | 2.29E-21                      | NA                            | 26     | 2.29E-19                      | 9.26E-21                      | NA                            | 26     | 1.48E-19                      | 5.61E-21                      | NA                            |
| 27     | 1.62E-19                      | 3.68E-21                      | NA                            | 27     | 9.28E-20                      | NA                            | NA                            | 27     | 1.28E-19                      | 6.83E-21                      | NA                            |
| 28     | 1.64E-19                      | 4.42E-21                      | NA                            | 28     | 1.26E-19                      | 4.77E-21                      | NA                            | 28     | 1.57E-19                      | 9.07E-21                      | NA                            |
| 29     | 2.61E-21                      | NA                            | NA                            | 29     | 3.66E-21                      | NA                            | NA                            | 29     | 1.28E-19                      | 4.45E-21                      | NA                            |
| 30     | NA                            | NA                            | NA                            | 30     | 1.31E-19                      | 7.45E-21                      | NA                            | 30     | 2.86E-19                      | 5.94E-21                      | NA                            |
| 31     | 2.19E-19                      | 4.90E-21                      | NA                            | 31     | 1.46E-19                      | 8.93E-21                      | NA                            | 31     | 4.47E-20                      | NA                            | NA                            |
| 32     | 1.59E-19                      | 2.41E-21                      | NA                            | 32     | 3.71E-20                      | NA                            | NA                            | 32     | 1.30E-20                      | NA                            | NA                            |
| 33     | 1.91E-19                      | 2.10E-21                      | NA                            | 33     | 1.58E-19                      | 1.11E-20                      | NA                            | 33     | 1.89E-19                      | 4.13E-20                      | 4.63E-21                      |
| 34     | 1.77E-20                      | NA                            | NA                            | 34     | 2.95E-20                      | NA                            | NA                            | 34     | 6.75E-20                      | 4.50E-21                      | NA                            |
| 35     | 2.42E-19                      | 5.13E-20                      | 5.47E-21                      | 35     | 1.93E-19                      | 1.11E-20                      | NA                            | 35     | 3.12E-21                      | NA                            | NA                            |
| 36     | NA                            | NA                            | NA                            | 36     | 9.85E-20                      | 5.65E-21                      | NA                            | 36     | 2.05E-19                      | 3.30E-20                      | 1.31E-21                      |
| 37     | 2.49E-19                      | NA                            | NA                            | 37     | 6.40E-20                      | 8.19E-21                      | NA                            | 37     | 2.60E-20                      | 2.50E-21                      | NA                            |
| 38     | 1.84E-19                      | 5.97E-21                      | NA                            | 38     | 4.59E-22                      | NA                            | NA                            | 38     | 3.28E-20                      | NA                            | NA                            |
| 39     | 1.37E-19                      | 2.38E-21                      | NA                            | 39     | 3.72E-21                      | NA                            | NA                            | 39     | 1.58E-19                      | 1.98E-20                      | 1.80E-21                      |
| 40     | 1.32E-21                      | NA                            | NA                            | 40     | 1.62E-19                      | 3.32E-20                      | 6.09E-21                      | 40     | 2.50E-19                      | 9.89E-21                      | NA                            |
| 41     | 1.19E-19                      | NA                            | NA                            | 41     | 1.22E-21                      | NA                            | NA                            | 41     | 1.54E-19                      | 1.29E-20                      | 7.70E-22                      |
| 42     | 1.40E-19                      | 4.15E-20                      | 6.80E-21                      | 42     | 2.11E-19                      | 7.35E-21                      | NA                            | 42     | 1.07E-19                      | 5.68E-21                      | NA                            |
| 43     | 1.65E-19                      | 4.03E-21                      | NA                            | 43     | 2.29E-19                      | 1.38E-20                      | NA                            | 43     | 1.56E-19                      | 2.73E-21                      | NA                            |
| 44     | 9.30E-20                      | 5.53E-21                      | NA                            | 44     | 2.11E-19                      | 1.21E-20                      | NA                            | 44     | 2.28E-19                      | 4.25E-21                      | NA                            |
| 45     | 5.89E-20                      | NA                            | NA                            | 45     | 2.56E-20                      | 6.76E-21                      | NA                            | 45     | 1.14E-19                      | 8.95E-21                      | NA                            |
| 46     | 2.61E-19                      | 9.99E-21                      | NA                            | 46     | 1.48E-19                      | 6.60E-21                      | NA                            | 46     | 1.07E-19                      | 6.77E-21                      | NA                            |
| 47     | 1.76E-19                      | 1.97E-21                      | NA                            | 47     | 9.86E-20                      | 5.14E-21                      | NA                            | 47     | 3.15E-21                      | NA                            | NA                            |
| 48     | 1.66E-19                      | 4.38E-21                      | NA                            | 48     | 6.37E-21                      | NA                            | NA                            | 48     | 3.83E-20                      | NA                            | NA                            |
| 49     | 1.69E-19                      | 1.19E-20                      | NA                            | 49     | 2.31E-19                      | 7.08E-21                      | NA                            | 49     | 7.96E-20                      | 1.58E-21                      | NA                            |
| 50     | 1.57E-19                      | 4.58E-21                      | NA                            | 50     | 1.67E-19                      | 7.29E-21                      | NA                            | 50     | 8.37E-20                      | 3.95E-21                      | NA                            |
| 51     | 1.60E-19                      | 8.02E-21                      | NA                            | 51     | 1.53E-19                      | 8.62E-21                      | NA                            | 51     | 1.47E-19                      | 3.34E-21                      | NA                            |
| 52     | 2.98E-20                      | NA                            | NA                            | 52     | 1.32E-19                      | 5.51E-21                      | NA                            | 52     | 2.59E-19                      | 2.11E-21                      | NA                            |
| 53     | 2.87E-19                      | 8.12E-21                      | NA                            | 53     | 6.30E-21                      | NA                            | NA                            | 53     | 1.08E-19                      | 2.32E-20                      | 2.38E-21                      |
| 54     | 1.39E-19                      | 3.44E-21                      | NA                            | 54     | 2.12E-19                      | 4.18E-20                      | 6.04E-21                      | 54     | 1.18E-19                      | 6.83E-21                      | NA                            |
| 55     | 4.48E-20                      | NA                            | NA                            | 55     | 9.09E-20                      | 6.99E-21                      | NA                            | 55     | 7.64E-20                      | 4.82E-21                      | NA                            |
| 56     | 2.83E-20                      | NA                            | NA                            | 56     | 8.14E-20                      | 1.78E-21                      | NA                            | 56     | 2.20E-19                      | 3.23E-20                      | 1.68E-21                      |
| 57     | 5.50E-20                      | NA                            | NA                            | 57     | 1.14E-19                      | 4.74E-21                      | NA                            | 57     | 5.95E-20                      | 2.69E-21                      | NA                            |
| 58     | 1.41E-19                      | 4.25E-21                      | NA                            | 58     | 8.52E-21                      | NA                            | NA                            | 58     | 6.65E-20                      | 5.57E-21                      | NA                            |
| 59     | 2.96E-21                      | NA                            | NA                            | 59     | 5.83E-20                      | NA                            | NA                            | 59     | 2.81E-20                      | NA                            | NA                            |
| 60     | NA                            | NA                            | NA                            | 60     | 3.00E-19                      | 1.25E-20                      | NA                            | 60     | 2.73E-20                      | 2.63E-21                      | NA                            |
| 61     | 1.44E-19                      | 2.19E-21                      | NA                            | 61     | 5.29E-21                      | NA                            | NA                            | 61     | 3.72E-21                      | NA                            | NA                            |
| 62     | NA                            | NA                            | NA                            | 62     | 1.78E-20                      | NA                            | NA                            | 62     | 1.24E-19                      | 2.77E-20                      | 5.21E-21                      |
| 63     | 1.24E-19                      | 4.27E-21                      | NA                            | 63     | 1.78E-19                      | 1.73E-20                      | 2.82E-21                      | 63     | 2.49E-19                      | 4.06E-20                      | 3.63E-21                      |
| 64     | 5.18E-20                      | NA                            | NA                            | 64     | 5.18E-20                      | 3.37E-21                      | NA                            | 64     | 3.88E-21                      | NA                            | NA                            |
| 65     | 2.84E-19                      | 4.82E-20                      | 4.42E-21                      | 65     | 2.69E-19                      | 8.01E-21                      | NA                            | 65     | 4.72E-20                      | 1.36E-21                      | NA                            |
| 66     | 2.07E-19                      | 3.30E-21                      | NA                            | 66     | 6.15E-20                      | 5.14E-21                      | NA                            | 66     | 2.16E-19                      | 1.34E-20                      | NA                            |
| 67     | 1.34E-19                      | 5.17E-21                      | NA                            | 67     | 2.05E-19                      | 4.50E-21                      | NA                            | 67     | 9.75E-20                      | 6.75E-21                      | NA                            |
| 68     | 6.22E-20                      | NA                            | NA                            | 68     | 8.08E-20                      | 7.35E-21                      | NA                            | 68     | 1.32E-19                      | 3.02E-21                      | NA                            |
| 69     | 4.39E-20                      | NA                            | NA                            | 69     | 1.87E-19                      | 6.49E-21                      | NA                            | 69     | 1.00E-19                      | 4.44E-21                      | NA                            |
| 70     | 1.72E-19                      | 7.93E-21                      | NA                            | 70     | 1.79E-19                      | 3.08E-20                      | 4.19E-21                      | 70     | 1.76E-19                      | 9.38E-21                      | NA                            |
| 71     | 2.14E-19                      | 7.73E-21                      | NA                            | 71     | 1.43E-19                      | 6.17E-21                      | NA                            | 71     | 3.06E-20                      | NA                            | NA                            |

|     |          |          |          |     |          |          |          |     |          |          |          |
|-----|----------|----------|----------|-----|----------|----------|----------|-----|----------|----------|----------|
| 72  | 1.91E-19 | 6.80E-21 | NA       | 72  | 2.50E-20 | NA       | NA       | 72  | 1.15E-20 | NA       | NA       |
| 73  | 6.19E-20 | NA       | NA       | 73  | 1.64E-19 | 3.26E-20 | 6.42E-21 | 73  | 2.22E-19 | 5.70E-21 | NA       |
| 74  | 1.46E-19 | 6.03E-21 | NA       | 74  | 1.54E-19 | 8.61E-21 | NA       | 74  | 1.68E-19 | 2.73E-20 | 3.59E-21 |
| 75  | 8.32E-20 | 3.44E-21 | NA       | 75  | 6.25E-21 | NA       | NA       | 75  | 7.90E-20 | 6.14E-21 | NA       |
| 76  | 1.56E-19 | 5.70E-21 | NA       | 76  | 1.56E-19 | 1.05E-20 | NA       | 76  | 1.49E-19 | 5.27E-21 | NA       |
| 77  | 5.94E-21 | NA       | NA       | 77  | 8.72E-20 | 6.48E-21 | NA       | 77  | 1.75E-19 | 1.22E-20 | NA       |
| 78  | 2.49E-19 | 4.93E-21 | NA       | 78  | 4.97E-21 | NA       | NA       | 78  | 9.61E-20 | 1.01E-20 | NA       |
| 79  | 8.47E-20 | 3.50E-21 | NA       | 79  | 1.65E-20 | NA       | NA       | 79  | 2.81E-19 | 4.79E-21 | NA       |
| 80  | 1.78E-19 | 5.93E-21 | NA       | 80  | 1.68E-19 | 4.73E-21 | NA       | 80  | 6.92E-20 | NA       | NA       |
| 81  | 2.84E-21 | NA       | NA       | 81  | 1.54E-19 | 5.60E-21 | NA       | 81  | 1.11E-19 | 2.54E-20 | 1.60E-21 |
| 82  | 1.94E-19 | 1.27E-20 | NA       | 82  | 1.83E-21 | NA       | NA       | 82  | 1.31E-19 | 2.17E-21 | NA       |
| 83  | 2.33E-19 | 1.20E-20 | NA       | 83  | 2.25E-20 | NA       | NA       | 83  | 2.63E-19 | 4.88E-21 | NA       |
| 84  | 1.49E-19 | 7.30E-21 | NA       | 84  | 1.49E-19 | 8.68E-21 | NA       | 84  | 8.27E-20 | 3.49E-21 | NA       |
| 85  | 1.93E-19 | 6.70E-21 | NA       | 85  | 1.26E-19 | 7.74E-21 | NA       | 85  | 7.42E-20 | 1.76E-21 | NA       |
| 86  | 2.30E-19 | 9.70E-21 | NA       | 86  | 8.79E-20 | NA       | NA       | 86  | 2.15E-20 | NA       | NA       |
| 87  | 9.79E-20 | 5.43E-21 | NA       | 87  | NA       | NA       | NA       | 87  | 2.92E-21 | NA       | NA       |
| 88  | 2.71E-19 | 3.70E-20 | 4.82E-21 | 88  | 9.41E-20 | 1.93E-21 | NA       | 88  | 1.19E-19 | 2.31E-21 | NA       |
| 89  | 3.78E-20 | NA       | NA       | 89  | 1.37E-19 | 1.02E-20 | NA       | 89  | 1.14E-20 | NA       | NA       |
| 90  | 1.08E-19 | 4.36E-21 | NA       | 90  | 7.11E-20 | NA       | NA       | 90  | 6.68E-21 | NA       | NA       |
| 91  | 1.43E-19 | 4.13E-21 | NA       | 91  | 7.34E-21 | NA       | NA       | 91  | 5.22E-20 | NA       | NA       |
| 92  | 1.05E-19 | 1.71E-21 | NA       | 92  | 3.04E-20 | NA       | NA       | 92  | 2.02E-19 | 5.98E-21 | NA       |
| 93  | 1.57E-19 | 7.97E-21 | NA       | 93  | 3.69E-20 | NA       | NA       | 93  | 6.33E-20 | 6.68E-21 | NA       |
| 94  | 1.82E-19 | 3.84E-21 | NA       | 94  | 3.00E-20 | NA       | NA       | 94  | 5.36E-20 | NA       | NA       |
| 95  | 9.09E-20 | NA       | NA       | 95  | 2.16E-19 | 2.59E-20 | 3.46E-21 | 95  | 1.35E-19 | 3.56E-20 | 4.87E-21 |
| 96  | 2.73E-19 | 3.32E-21 | NA       | 96  | 1.32E-19 | 3.97E-21 | NA       | 96  | 1.08E-19 | 6.87E-21 | NA       |
| 97  | 1.20E-19 | 7.15E-21 | NA       | 97  | 2.11E-19 | 5.59E-21 | NA       | 97  | 3.66E-20 | 2.39E-21 | NA       |
| 98  | 8.27E-20 | NA       | NA       | 98  | 1.94E-20 | NA       | NA       | 98  | 2.50E-19 | 1.31E-20 | NA       |
| 99  | 2.09E-19 | 3.52E-20 | 2.39E-21 | 99  | 1.37E-19 | 8.29E-21 | NA       | 99  | 1.72E-19 | 1.14E-20 | NA       |
| 100 | NA       | NA       | NA       | 100 | 3.49E-20 | NA       | NA       | 100 | 9.67E-20 | 7.63E-21 | NA       |



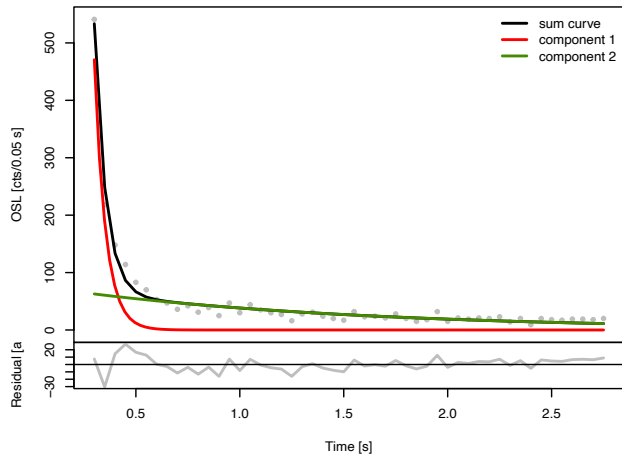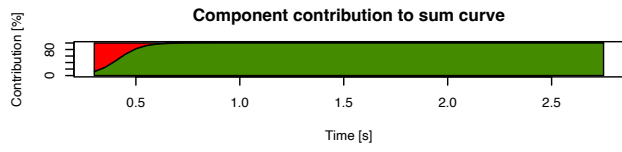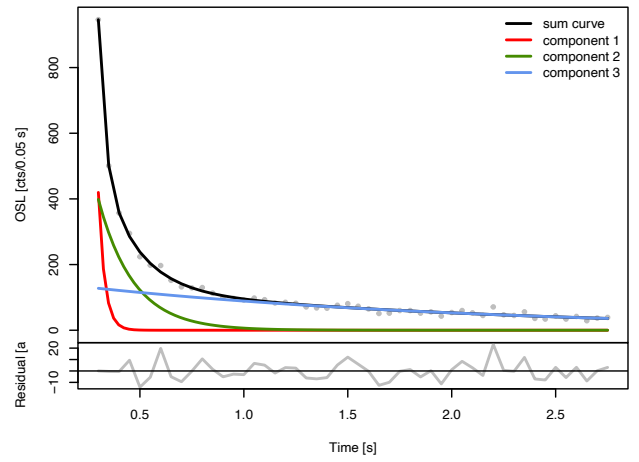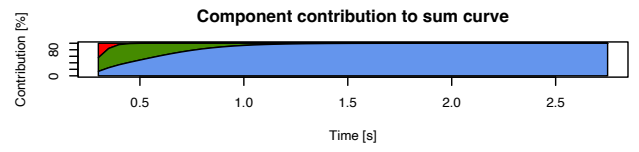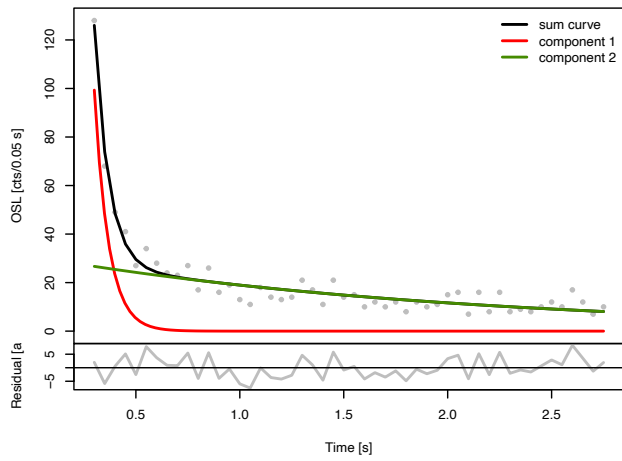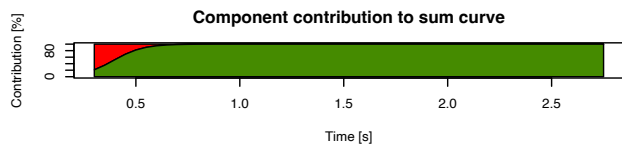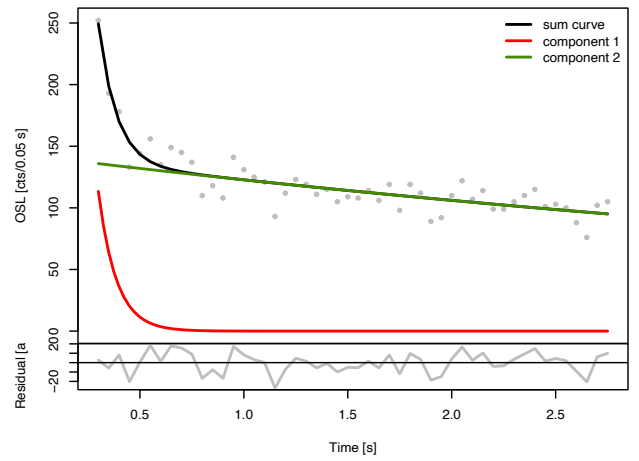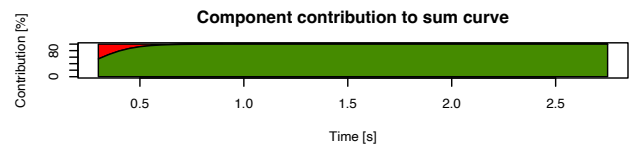

Figure S7. OSL decomposition of four randomly selected signals of sample ZR229.

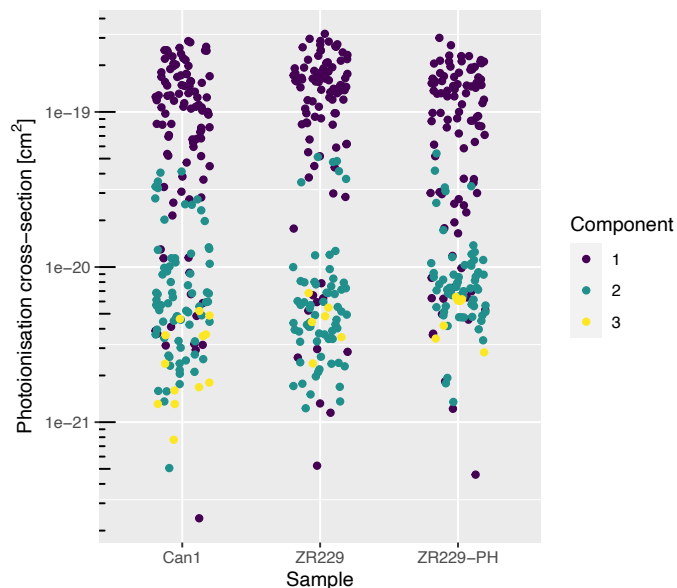

**Figure S8.** Summary of photoionisation cross-sections for 100 holes of a single-grain disc each for three samples, as derived from CW-OSL curve fitting.

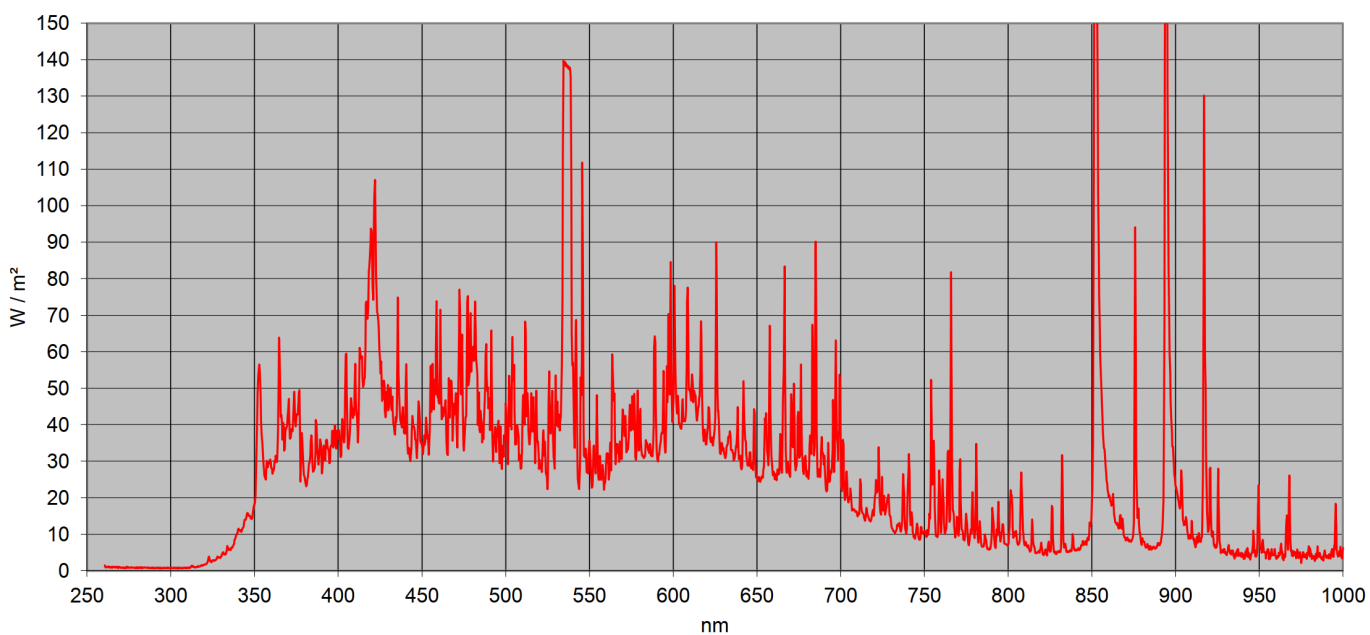

**Figure S9.** Emission spectrum of the bulb built in the Hönle UVACube 400 used to bleach the zircon samples (data from the manufacturer).
